# Supplementary material
Source: PubMed Central journal article supplement (PMC7020562)
Supplement: NIHMS1063917-supplement-Supplemental_Material.pdf [file NIHMS1063917-supplement-Supplemental_Material.pdf]

## Supplementary Materials for

### **Pediatric patients with acute lymphoblastic leukemia generate abundant and functional neoantigen-specific CD8<sup>+</sup> T cell responses**

Anthony E. Zamora, Jeremy Chase Crawford, E. Kaitlynn Allen, Xi-zhi J. Guo, Jesse Bakke, Robert A. Carter, Hossam A. Abdelsamed, Ardiana Moustaki, Yongjin Li, Ti-Cheng Chang, Walid Awad, Mari H. Dallas, Charles G. Mullighan, James R. Downing, Terrence L. Geiger, Taosheng Chen, Douglas R. Green, Benjamin A. Youngblood, Jinghui Zhang, Paul G. Thomas\*

\*Correspondence to: [paul.thomas@stjude.org](mailto:paul.thomas@stjude.org)

#### **This PDF file includes:**

##### Materials and Methods

Fig. S1. Experimental pipeline used to identify cancer neoepitopes.

Fig. S2. Phenotypic characterization of CD8<sup>+</sup> tumor infiltrating lymphocytes from human bone marrow samples.

Fig. S3. Generation of aAPCs expressing single patient-specific HLA class I molecules.

Fig. S4. Healthy donors exhibit negligible responses against endogenous neoantigens.

Fig. S5. Neoepitope tetramers are patient-specific and exhibit negligible nonspecific binding.

Fig. S6. Phenotypic characterization of neoepitope-specific CD8<sup>+</sup> TILs.

Fig. S7. Patient-specific transcriptional profiles.

Fig. S8. Phenotypic characterization of patient-specific CD19<sup>+</sup> tumor cells.

Table S1. Patient ALL subtypes

Table S2. FPKM values for HLA genes

Table S3. Patient-specific neoepitopes

Table S4. Tetramers used for specificity assays

Table S5. Fluidigm primer list

Table S6. Peptides for functional assays

Table S7. Mutant allele frequencies (MAF) for sequenced mutations

Table S8. Single-cell indexed FACS median fluorescence intensity (MFI).

#### **Other Supplementary Material for this manuscript includes the following:**

Data file S1. Primary data



## **Materials and Methods**

### **Patient Samples, Sequencing, and Variant Detection**

The use of human tissues was approved by the institutional review board (IRB #00000029 – Expedited Protocol XPD-13-098) of St. Jude Children’s Research Hospital. Tumor samples were obtained from diagnostic bone marrow biopsies, whereas matched germline samples were obtained either from peripheral blood, bone marrow, or adjacent normal tissue. Bone marrow mononuclear cells (BMMCs) were isolated from bone marrow biopsy samples by density gradient centrifugation using Lymphoprep (StemCell Technologies) under sterile conditions in a biological safety cabinet. After removal of the mononuclear layer, cells were counted, adjusted to  $1-2 \times 10^7$  cells/mL in 1-1.5 mL of cryopreservative media, and underwent program-controlled freezing in a Planer Kryo 560-16 freezer. Whole-genome sequencing was performed for each tissue type on all patients, and in some cases (N = 4 in this cohort) additional whole-exome sequencing (WES) was performed. mRNA sequencing was performed on tumor tissues only. The sequencing, alignment against the human reference genome, and the identification and validation of somatic non-synonymous mutations was described in detail elsewhere (71,72). Somatic gene fusions were identified with mRNA sequences using the “CICERO” algorithm as performed elsewhere (72).

### **Neoepitope prediction**

Class I HLAs were inferred for each patient from diagnostic paired-end mRNA-Seq data using OptiType (73) configured with the IBM CPLEX optimizer and at 5 enumerations, and FPKM values were obtained using gencode annotations with featureCounts (74) and edgeR (75). Using these predicted HLAs, all tumor-specific nonsynonymous mutations and genomic fusions were

computationally screened for antigenicity using the same tools as a pipeline described in detail elsewhere (36) and locally adapted for this study. For each mutation with a known reading frame, a sliding-window approach was used to generate all unique peptide sequences of lengths 8-15aa that contained the tumor-specific amino acid at any position. Unique peptides were similarly generated for genomic fusions, instead sliding the two amino acids at the fusion junction along the peptide sequence window. The binding affinity between each of these peptides and each of the patient's HLA class I alleles was modeled using NetMHCcons (76), which was chosen due to this algorithm's high sensitivity and specificity across multiple HLA alleles (76,77). Based on criteria used in similar studies (30, 78), we classified peptides as either predicted strong binders ( $IC_{50} < 150$  nM), intermediate binders ( $150 \text{ nM} \geq IC_{50} \leq 500$  nM), or non-binders ( $IC_{50} > 500$  nM), and only predicted binders were considered further. For each putative neoepitope derived from a nonsynonymous mutation, the predicted binding affinity of the respective parent peptide (i.e., the germline peptide sequence without the tumor-specific amino acid) was also modeled for each of the patient's HLA alleles.

## **Flow Cytometry**

To determine the phenotype of tumor infiltrating lymphocytes, we performed flow cytometric analysis on CD8<sup>+</sup> T-cell subsets (Naïve: CD3<sup>+</sup>CD8<sup>+</sup>CCR7<sup>+</sup>CD45RO<sup>-</sup>, Tem: CD3<sup>+</sup>CD8<sup>+</sup>CCR7<sup>+</sup>CD45RO<sup>+</sup>, Teff/emra CD3<sup>+</sup>CD8<sup>+</sup>CCR7<sup>-</sup>CD45RO<sup>-</sup> and Tem: CD3<sup>+</sup>CD8<sup>+</sup>CCR7<sup>-</sup>CD45RO<sup>+</sup>) from thawed bone marrow samples obtained from patients with B-ALL. BMMCs were initially stained with Live/Dead Aqua (Life Technologies) per manufacturer's instructions. Briefly, cells were centrifuged, washed, and resuspended in 1 mL of PBS to which 1 µL of reconstituted dye was added. Cells were then incubated for 20-30 minutes

at room temperature, protected from light. Following incubation, the cells were washed twice with 1 mL of staining buffer (1X DPBS, 2% FBS, 1mM EDTA, and 0.02% sodium azide). Cells were then stained for surface markers, as described above, in sorting buffer for 20 minutes at room temperature using the following human monoclonal antibodies (mAbs): APC/Cy7- CD3 (BioLegend 344818, Clone SK7), PB-CD8a (Biolegend 301033, Clone RPA-T8), FITC-CCR7 (BioLegend 353216, Clone G043H7), APC-CD45RO (BioLegend 304210, Clone UCHL1). Following surface staining, cells were washed twice, resuspended in 300  $\mu$ L of staining buffer, and then analyzed using a custom-configured BD Fortessa using FACSDiva software (Becton-Dickinson). Data were analyzed using FlowJo software (TreeStar).

To determine the phenotype of tumor cells, we performed flow cytometric analysis on CD19<sup>+</sup> B cells from thawed bone marrow samples obtained from patients with B-ALL. BMMCs were initially stained with Live/Dead Aqua (Life Technologies) as described above. Cells were also stained for various surface markers, using the following human mAbs: CD3 (APC/Fire750-conjugated, BioLegend 344840, clone SK7; used as dump gate), CD8a (BV785-conjugated, BioLegend 301046, clone RPA-T8; used as dump gate), CD19 (PerCP/Cy5.5-conjugated, BioLegend 302230, clone HIB19), HLA-A2 (FITC-conjugated (BioLegend 343303) or BV421-conjugated (BioLegend 343325), clone BB7.2), HLA-A30, A31 (biotin-conjugated, One Lambda), CD273 (APC-conjugated, BioLegend 329608, clone 24F.10C12), CD274 (PE-conjugated, BioLegend 329706, clone 29E.2A3), Galectin-9 (FITC-conjugated, BioLegend 348912, clone 9M1-3). Following surface staining, cells were washed twice, resuspended in 300  $\mu$ L of staining buffer, and then analyzed using a custom-configured BD Fortessa using FACSDiva software (Becton-Dickinson). Data were analyzed using FlowJo software (TreeStar).

## **Peptide synthesis**

Peptides corresponding to patient-specific neoantigens were synthesized at the Peptide Synthesis Facility at St. Jude Children's Research Hospital, GenScript, or the Immune Monitoring Core at Fred Hutchinson Cancer Research Center. All peptides were synthesized as free acids and were more than 80% pure. For functional assays, sterile stock solutions of 1 mM 15mer peptides were prepared from lyophilized peptides reconstituted in the manufacturer's recommended solvent (ultrapure water or dimethyl sulfoxide) and stored at -20°C. On the day of the experiment, stock solutions were diluted in complete RPMI media (RPMI 1640 supplemented with 10% FBS, 100 U/mL penicillin, 100 µg/mL streptomycin, 2mM glutamine, 1mM sodium pyruvate, 25 mM Hepes, and 1X non-essential amino acids) to a final concentration ranging from 1µM to 10 pM. For tetramer binding assays, 9-10mer peptides were synthesized by the Immune Monitoring Core at Fred Hutchinson Cancer Research Center and used to synthesize monomers and tetramers corresponding to patient-specific neoepitopes.

## **Generation of lentiviral-transduced K562 aAPCs**

gBlock gene fragments, encoding HLA-A\*02:01, HLA-A\*30:02, HLA-B\*15:03, HLA-B\*18:01, or HLA-B\*53:01 were obtained from Integrated DNA Technologies (IDT). Each HLA gBlock was cloned into the pLVX-EF1a-IRES-Puro bicistronic lentiviral expression vector (Clontech). Lentivirus was generated by transfection of pLVX lentivirus vector containing an HLA insert, psPAX2 packaging plasmid, and pMD2.G envelope plasmid into 293T packaging cell line. Viral supernatant was harvested and filtered 24 and 48 hours after transfection. K562 cells (American Type Culture Collection (ATCC)) were transduced and selected with 2 µg/ml puromycin for one week in Iscove's Modified Dulbecco's Medium (IMDM; ATCC) containing 10% FBS. Routine

assays for expression of single HLA class I molecules via flow cytometric analysis and for mycoplasma (Lonza) were conducted.

### **Artificial APC (aAPC) functional assays using exogenous peptides**

BMMCs were thawed, resuspended to  $2 \times 10^6$  cells/mL in complete RPMI media, and rested in an incubator (37°C, 5% CO<sub>2</sub>) for 2 hours with DNase I (100 U/mL; Worthington Biochemicals). The BMMCs were examined for viability by trypan blue exclusion and adjusted to  $5 \times 10^7$  cells/mL in separation buffer (PBS with 2% FBS and 1mM EDTA). CD8<sup>+</sup> T cells were enriched by negative selection (>90% purity) using the EasySep Human CD8<sup>+</sup> T Cell Isolation Kit (StemCell Technologies) according to the manufacturer's instructions. Enriched CD8<sup>+</sup> T cells ( $1-2 \times 10^5$ ) were co-cultured with aAPCs ( $1-2 \times 10^5$ ) expressing a single patient-specific HLA molecule that were pulsed with 1 μM of the appropriate peptide (either patient-specific 15mer neoantigen or 15mer irrelevant peptide), and 1 μg/mL each of anti-human CD28/CD49d (BD Biosciences) for 1 hour in an incubator (37°C, 5% CO<sub>2</sub>). An unstimulated (CD28/CD49d) and positive control (SEB, 100 μg/mL or 1X eBioscience Cell Stimulation Cocktail, PMA/ionomycin) were included in each assay. Following the one-hour incubation, monensin (Golgistop, 0.7 μL/mL; BD Biosciences) and brefeldin A (GolgiPlug, 1 μL/mL; BD Biosciences) were added to the cell cultures and the cells were placed back into the incubator (37°C, 5% CO<sub>2</sub>) for an additional 5 hours. Following incubation, the cells were washed twice with PBS, and stained with live/dead fixable violet amine reactive dye (Invitrogen Corporation) according to the manufacturer's instructions. The cells were then washed with staining buffer and stained with a cocktail of surface antibodies. The cells were washed with staining buffer, and then fixed and permeabilized using the Cytfix/Cytoperm kit (BD Biosciences) according to the manufacturer's

instructions. Following fixation and permeabilization, the cells were washed twice with 1X Perm/Wash buffer and stained with anti-IFN $\gamma$  (FITC-conjugated, BD Biosciences, clone 25723.11 or AF647-conjugated, BioLegend, clone 4S.B3) and anti-TNF $\alpha$  (APC-conjugated, BD Biosciences, clone 6401.1111 or BV605-conjugated, BioLegend, clone MAb11) or corresponding isotype control antibodies. Cytokine-responsive cells were determined by subtracting the amount of IFN $\gamma$  and TNF $\alpha$  produced by CD8<sup>+</sup> T cells stimulated with an irrelevant peptide from the amount produced when stimulating with a peptide corresponding to patient-specific tumor neoantigens and subsequently normalizing to the response obtained using a polyclonal source of stimulation (SEB and/or PMA/Ionomycin).

#### **Autologous tumor functional assays using exogenous peptides**

BMMCs were thawed, resuspended to  $2 \times 10^6$  cells/mL in complete RPMI media, and rested in an incubator (37°C, 5% CO<sub>2</sub>) for 2-6 hours with DNase I (100 U/mL; Worthington Biochemicals). The BMMCs were examined for viability by trypan blue exclusion and adjusted to  $1-2 \times 10^6$  cells/mL. BMMCs ( $1-2 \times 10^6$ ) were incubated with 1  $\mu$ g/mL each of anti-human CD28/CD49d (BD Biosciences), 1  $\mu$ M to 10 pM of the appropriate peptide (either patient-specific 15mer neoantigen or 15mer irrelevant peptide; see Table S6), and CD107a (PE-conjugated or BV650-conjugated, BioLegend, clone H4A3) and CD107b (PE-conjugated, BioLegend, clone H4B4) for 1 hour in an incubator (37°C, 5% CO<sub>2</sub>). An unstimulated (CD28/CD49d) and positive control (Staphylococcus enterotoxin B (SEB), 100  $\mu$ g/mL or 1X eBioscience Cell Stimulation Cocktail, phorbol 12-myristate 13-acetate (PMA) and ionomycin) were included in each assay. Following the one-hour incubation, monensin (Golgistop, 0.7  $\mu$ L/mL; BD Biosciences) and brefeldin A (GolgiPlug, 1  $\mu$ L/mL; BD Biosciences) were added to



the cell cultures and the cells were placed back into the incubator (37°C, 5% CO<sub>2</sub>) for an additional 5 hours. Following incubation, the cells were washed twice with PBS, and stained with live/dead fixable violet amine reactive dye (Invitrogen Corporation) according to the manufacturer's instructions. The cells were then washed with staining buffer (PBS containing 1% FBS and 0.02% Sodium Azide) and stained with a cocktail of surface antibodies. The cells were washed with staining buffer, and then fixed and permeabilized using the Cytofix/Cytoperm kit (BD Biosciences) according to the manufacturer's instructions. Following fixation and permeabilization, the cells were washed twice with 1X Perm/Wash buffer and stained with anti-IFN $\gamma$  (FITC-conjugated, BD Biosciences, clone 25723.11 or AF647-conjugated, BioLegend, clone 4S.B3) and anti-TNF $\alpha$  (APC-conjugated, BD Biosciences, clone 6401.1111 or BV605-conjugated, BioLegend, clone MAb11) or corresponding isotype control antibodies. Cytokine-responsive and degranulating cells were determined by subtracting the amount of IFN $\gamma$ , TNF $\alpha$ , and CD107a/b produced by CD8<sup>+</sup> T cells stimulated with an irrelevant peptide from the amount produced when stimulating with a peptide corresponding to patient-specific tumor neoantigens and subsequently normalizing to the response obtained using a polyclonal source of stimulation (SEB and/or PMA/Ionomycin).

### **Generation of tandem minigene (TMG) constructs, and in-vitro-transcribed (IVT) RNA**

Minigenes were generated for each non-synonymous somatic mutation (and corresponding wild-type sequence) to encode the mutated (or wild-type) amino acid flanked bilaterally with 12 wild-type amino acids, resulting in a 25 amino acid peptide. TMG constructs were synthesized from multiple minigenes (2-7 per plasmid) arranged in tandem for a given patient. Each TMG construct was codon optimized, synthesized, and cloned into a pcDNA3.1 expression vector

using available EcoRI and NotI cut sites (GenScript). TMG plasmids were linearized with the restriction enzyme SmaI (NEB), and each linearized plasmid was used as a template for in-vitro-transcribed RNA using the mMMESSAGE mMACHINE T7 Ultra Transcription Kit (Thermo Fisher Scientific) according to the manufacturer's instructions. RNA was purified using the MEGAclean Transcription Clean-Up Kit (Thermo Fisher Scientific) according to the manufacturer's instructions. Subsequently, RNA concentration was determined using a NanoDrop spectrophotometer and stored at -80°C until later use.

### **Preparation of autologous tumor cells and CD8<sup>+</sup>TILs for TMG and IVT functional assays**

Autologous tumor cells (CD19<sup>+</sup> B cells) were positively selected (>90% purity) from patient's bone marrow samples using the EasySep Human CD19<sup>+</sup> Positive Selection Kit II (StemCell Technologies) according to the manufacturer's instructions. Enriched CD19<sup>+</sup> tumor cells were cultured overnight in complete RPMI media, supplemented with multimeric CD40L (1000 ng/mL; AdipoGen Life Sciences), IL-4 (10 ng/mL), IL-21 (10 ng/mL), and BAFF (10 ng/mL) (all cytokines from GenScript). Following positive selection of CD19<sup>+</sup> tumor cells, the flow through was used to enrich for CD8<sup>+</sup> T cells by negative selection (>85% purity) using the EasySep Human CD8<sup>+</sup> T Cell Isolation Kit (StemCell Technologies) according to the manufacturer's instructions. Enriched CD8<sup>+</sup> T cells were cultured overnight in GT-T551 T cell culture media (Takara Bio), supplemented with recombinant human IL-2 (300 IU/mL; PeproTech).

### **TMG plasmid DNA transfection of aAPCs**

aAPCs expressing a single patient-specific HLA molecule were transfected with corresponding mutant or wild-type (parent) TMG plasmid DNA using the Neon Transfection System (Thermo Fisher Scientific) according to the manufacturer's instructions. Briefly, aAPCs were resuspended in the kit's Resuspension Buffer R at a concentration of  $1 \times 10^7$  cells/mL. The aAPCs were mixed with TMG plasmid DNA (1  $\mu$ g plasmid DNA per  $1 \times 10^6$  cells), aspirated into the 100  $\mu$ L Neon Tip, and electroporated with 1,450 V for 10 ms and three pulses in the Neon device. Electroporated cells were transferred into 6-well plates containing 2 mL of IMDM media supplemented with 10% FBS, and incubated (37°C, 5% CO<sub>2</sub>) overnight for use in TMG co-culture functional assays. Transfection efficiencies were routinely between 70-90%, on the basis of green fluorescent protein (GFP) expression 24 hours after transfection of aAPCs with control pcDNA3.1-GFP plasmid DNA (GenScript).

### **TMG RNA transfection of autologous tumor cells**

Positively selected autologous tumor cells (CD19<sup>+</sup> B cells) were transfected with either mutant or wild-type (parent) TMG RNA using the Lipofectamine MessengerMAX (Thermo Fisher Scientific) according to the manufacturer's instructions. Briefly, 10  $\mu$ g of the in-vitro-transcribed plasmid RNA was complexed to diluted Lipofectamine MessengerMAX Reagent in Opti-MEM reduced serum media. After a brief 5 minute incubation at room temperature, the RNA-lipid complex was added to  $1 \times 10^6$  tumor cells in 6-well plates, and incubated (37°C, 5% CO<sub>2</sub>) overnight for use in TMG co-culture functional assays. Transfection efficiencies were routinely between 40-60%, as assessed by GFP expression at 24 hours after transfection of tumor cells with a control GFP-encoding RNA (TriLink BioTechnologies) or with in-vitro-transcribed RNA generated from the pcDNA3.1-GFP plasmid (GenScript).

### **TMG co-culture functional assays**

Enriched CD8<sup>+</sup> T cells from patient bone marrow samples or from healthy donor PBMCs were co-cultured with mutant or wild-type (parent) TMG-electroporated target cells at a ratio of 1:2 aAPCs or 1:5 tumor cells in complete RPMI media, respectively. Additionally, mock-TMG cells (target cells electroporated or cultured with lipofectamine reagents in the absence of plasmid DNA or RNA, respectively) or CD8<sup>+</sup> T cells alone, with or without PMA/Ionomycin, were used as controls. Co-cultured cells were incubated (37°C, 5% CO<sub>2</sub>) for two hours, after which monensin (Golgistop, 0.7 µL/mL; BD Biosciences) and brefeldin A (GolgiPlug, 1 µL/mL; BD Biosciences) were added to the cell cultures and the cells were placed back into the incubator (37°C, 5% CO<sub>2</sub>) for an additional 8-10 hours. Following incubation, the cells were washed twice with PBS, and stained with live/dead fixable violet amine reactive dye (Invitrogen Corporation) according to the manufacturer's instructions. The cells were then washed with staining buffer and stained with a cocktail of surface antibodies. The cells were washed with staining buffer, and then fixed and permeabilized using the Cytofix/Cytoperm kit (BD Biosciences) according to the manufacturer's instructions. Following fixation and permeabilization, the cells were washed twice with 1X Perm/Wash buffer and stained with anti-IFN $\gamma$  (AF647-conjugated, BioLegend, clone 4S.B3) and anti-TNF $\alpha$  (BV605-conjugated, BioLegend, clone MAb11) antibodies. Cytokine-responsive CD8<sup>+</sup> T cells were determined by subtracting the amount of IFN $\gamma$  or TNF $\alpha$  produced by CD8<sup>+</sup> T cells co-cultured with mock-TMG cells from the amount produced when co-culturing with mutant or wild-type (parent) TMG transfected cells and subsequently normalizing to the response by enriched CD8<sup>+</sup> T cells stimulated with PMA/Ionomycin.

### **TIL expansion and generation of tumor-reactive CD8<sup>+</sup> T cell lines**

Tumor-reactive CD8<sup>+</sup> T cells from two diagnostic patient (ERG009 and ETV078) specimens were generated by co-culturing 2-3 x 10<sup>4</sup> sorted CD8<sup>+</sup> T cells with 8 x 10<sup>4</sup> autologous CD19<sup>+</sup> tumor cells in GT-T551 T cell culture media (Takara Bio), supplemented with 10% human AB serum (Gemini Bio-Products), recombinant human IL-2 (6,000 IU/mL, PeproTech,) and CD3 stimulation (30 ng/mL anti-CD3 antibody, clone OKT3, Miltenyi Biotec; or Dynabeads Human T-Activator CD3/CD28, Thermo Fisher) for a total of 21 days. A negative control (non-neoantigen expressing target) for each patient was included, in parallel, by co-culturing 2-3 x 10<sup>4</sup> sorted CD8<sup>+</sup> T cells with 8 x 10<sup>4</sup> aAPCs expressing patient-specific HLAs using the same culturing conditions and reagents outlined above. Tumor reactivity was determined by flow cytometry after 21 days of co-culturing by staining samples with Live/Dead Aqua (Life Technologies), an antibody against CD8a (BV785-conjugated, BioLegend 301046, clone RPA-T8), and with pre-titrated mutant, wild-type, or irrelevant APC- and/or PE-conjugated tetramers as outlined below.

### **Tetramer-binding assay**

Tetramers corresponding to patient-specific neoepitopes (9-10mers binding patient-specific HLA class I molecules; Table S4) were synthesized at the Immune Monitoring Core at Fred Hutchinson Cancer Research Center. Table S4 lists all of the 10mer-containing tetramers for the neoepitopes for ERG009 that successfully refolded. For several cases, we had greater success producing tetramers containing 9mers due to improper folding when using peptides of longer length, thus we focused on the 9mer containing tetramers for subsequent patient samples. For tetramer-binding assays, BMDCs were thawed, resuspended to 2 x 10<sup>6</sup> cells/mL in complete

RPMI media, and rested in an incubator (37°C, 5% CO<sub>2</sub>) for 2 hours with DNase I (100 U/mL; Worthington Biochemicals). After 2 washes with PBS, 2-4 x 10<sup>6</sup> cells were incubated (37°C, 5% CO<sub>2</sub>) for 30 mins in PBS containing 50 nM dasatinib. Subsequently, cells were stained with pre-titrated mutant (cancer neoantigen bound to patient-specific HLA), wild-type (parent self-peptide bound to patient-specific HLA), and/or irrelevant (nonself-antigen bound to patient-specific HLA) APC- or PE-conjugated tetramers for 20 mins in the incubator (37°C, 5% CO<sub>2</sub>). After 2 washes with PBS, anti-PE (BioLegend, clone PE001) or anti-APC (BioLegend, clone APC003) primary unconjugated antibodies were added to the cells. After 2 washes with staining buffer, cells were stained with a selection of the following cell surface monoclonal antibodies (mAbs): CD3 (APC/Fire750-conjugated, BioLegend 344840, clone SK7), CD4 (PerCP/Cy5.5-conjugated, BioLegend 317428, clone OKT4), CD14 (PerCP/Cy5.5-conjugated, BioLegend 301824, or PE/Cy7-conjugated, BD Biosciences 557742, clone M5E2), CD19 (PerCP/Cy5.5-conjugated, BioLegend 302230, clone HIB19), CD8a (BV785-conjugated, BioLegend 301046, clone RPA-T8), CD45RO (BV605-conjugated, BioLegend 304238, clone UCHL1), CCR7 (FITC-conjugated, BioLegend 353216, clone G043H7), PD-1 (PE- or PE/Cy7-conjugated, BioLegend 329906/329918, clone EH12.2H7), TIM-3 (SuperBright436-conjugated, eBioscience 62-3109-42, or PE/Cy7-conjugated, BioLegend 345014, clone F38-2E2), and/or CD45RA (BV421-conjugated, BioLegend 304130, clone HI100). The cells were washed twice with PBS, and stained with live/dead fixable violet amine reactive dye (Invitrogen Corporation) according to the manufacturer's instructions. The cells were then washed with staining buffer and analyzed on a custom-configured BD Fortessa using FACSDiva software (Becton-Dickinson). Data were analyzed using FlowJo software (TreeStar). The distinction of neoepitope-specific CD8<sup>+</sup> T cells was restricted to those tetramer-positive CD8<sup>+</sup> T cells that bound patient-specific neoepitope

(mutant) tetramers with a 5-fold greater frequency than CD8<sup>+</sup> T cells bound to either the parent (self-peptide containing) tetramer or to an irrelevant tetramer containing a patient associated HLA.

### **Generation of retroviral-transduced SUP-T1 cells**

$\alpha\beta$  TCR sequences were amplified from tetramer-sorted (HLA-A\*30:02 PLCD3<sub>(311-319)</sub> mutant tetramer) single cells as described previously (79). gBlock gene fragments encoding the clonal TCR $\alpha\beta$  were obtained from Integrated DNA Technologies (IDT). Each TCR $\alpha\beta$  gBlock was cloned into the MSCV-IRES-Thy1.1 DEST retroviral expression vector (Addgene).

Recombinant MSCV-IRES-Thy1.1 plasmids with full length TCR $\alpha\beta$  inserts were isolated in small scale using a NucleoSpin Plasmid kit (Clontech) and in large scale, for transfection, using a Plasmid Midi kit (Qiagen) per the manufacturer's instructions. TCR $\alpha\beta$  and retroviral packaging vectors (5  $\mu$ g of each) were co-transfected into Phoenix GP cell line (ATCC<sup>®</sup> CRL-3215) using Lipofectamine 3000 (ThermoFisher) per the manufacturer's instructions. Supernatant was collected 24 and 48 hours after transfection and centrifuged at 2000g for 2 hours after overnight incubation with retrovirus concentrator (Retro-X, Clontech) at 4°C. The retrovirus pellets were resuspended in complete RPMI medium and stored at -20°C. SUP-T1 cells (ATCC CRL-1942) were cultured in the retrovirus-containing c-RPMI medium at 37°C and 5% CO<sub>2</sub> for 72 hours. Routine assays for TCR $\alpha\beta$  expression were performed using flow cytometric analysis, and

neoepitope specificity of the TCR $\alpha\beta$ -transduced SUP-T1 cells were verified using neoepitope-specific tetramers.

### **Fluidigm gene expression methods**

Single-cell gene expression experiments were performed using Fluidigm's DynamicArray microfluidic chips (Fluidigm) following manufacturer's instructions (Two-Step Single-cell gene expression using EvaGreen Supermix on Biomark HD System). Single cells were sorted from three patient samples using the Sony SY3200 into individual wells of 96-well plates that had been preloaded with 5  $\mu\text{L}$  consisting of 1.2  $\mu\text{L}$  5X SuperScript VILO Reaction Mix (Thermo Fisher), 0.3  $\mu\text{L}$  SUPERase-In (20 U/ $\mu\text{L}$ ; Thermo Fisher), 0.25  $\mu\text{L}$  10% NP40 (Thermo Fisher), and nuclease free water (Teknova). Each plate contained two empty wells for use as non-template controls (NTC). After successful sorting, the plates were incubated at 65°C for 90 seconds, and chilled on ice for 5 minutes for RNA denaturation. The remaining components of the RT reaction were added to each well, including 0.15  $\mu\text{L}$  10X SuperScript Enzyme Mix (Thermo Fisher), 0.12  $\mu\text{L}$  T4 Gene 32 Protein (NEB), and nuclease free water (Teknova). Thermal cycling conditions for the reverse transcription of single-cell mRNA into cDNA was 25°C for 5 min, 50°C for 30 min, 55°C for 25 min, 60°C for 5 min, 70°C for 10 min, and then hold at 4°C. After reverse transcription, the cDNA was amplified using 1.5  $\mu\text{L}$  of a pool of the designed primers (STA mix; Fluidigm), 7.5  $\mu\text{L}$  TaqMan PreAmp Master Mix (Thermo Fisher), and 0.075  $\mu\text{L}$  0.5M EDTA (Thermo Fisher). The thermal cycling conditions were 95°C for 10 min, 20 cycles of 96° for 5 sec and 60°C for 4 min, and then hold at 4°C. Amplified cDNA was then treated with Exonuclease I (NEB) to remove any unincorporated primers by adding 6  $\mu\text{L}$  of 4 U/ $\mu\text{L}$  Exonuclease I (20 U/ $\mu\text{L}$  Exonuclease I diluted with water and 10X Exonuclease I



Reaction buffer). Thermal cycling conditions were 37°C for 30 min, 80°C for 15 min, and then hold at 4°C. The cDNA was then diluted 5-fold for loading onto the chip.

The sample mix to be loaded onto the chip included 2.5 µL 2X Sso Fast EvaGreen Supermix with low ROX (Bio-Rad), 0.25 µL 20S DNA Binding Dye Sample Loading Reagent (Fluidigm), and 2.25 µL of the prepared cDNA. The assay mix loaded onto the chip included 2.5 µL 2X Assay Loading Reagent (Fluidigm), 1X DNA Suspension Buffer (Teknova), and 100 µM of each forward and reverse primer mix (Fluidigm). Each chip was primed immediately before loading the 5 µL of each sample mix and 5 µL of each assay mix onto the chip. The chips were then loaded using the IFC Controller HX (Fluidigm) and transferred to the Biomark HD real-time PCR reader to analyze using the GE Fast 96x96 PCR+Melt v2 protocol.

### **Analysis and visualization of single-cell expression data**

Ct values were recovered from the BioMark HD, and data were then analyzed using the Fluidigm Real-Time PCR Analysis software. The quality threshold was set to 0.65, and a linear derivative was used for baseline correction. Cells were removed from further analysis if they had low or absent ACTB and GAPDH expression (n=35). As positive controls, PBMC samples from healthy donors were sorted exactly as patient samples (CCR7<sup>-</sup>CD45RO<sup>+</sup> and CCR7<sup>+</sup>CD45RO<sup>-</sup>) in bulk (at least 100 cells per well). Fluidigm reactions with T<sub>m</sub> that did not match what was observed in the positive controls were excluded from analysis. Genes were removed if amplification was found in the non-template control wells (n=3), if there were several melting temperature curves (n=1), if median Ct values were <6 (n=1), or if there was no expression in

any reaction (n=1). A list of the 88 DeltaGene assays used in this study with primer sequences is provided in Table S5.

Ct values of filtered single-cell expression data were converted to expression thresholds (Et) and analysed using the MAST statistical framework (70) in R, which utilizes hurdle models designed specifically for single-cell expression data that take into account both the proportion of cells expressing a gene and the expression of the gene. Cells with a cellular detection rate in the 1% and 99% quantiles were filtered from further analysis, and missing data points were considered as zero-values unless otherwise indicated.

To facilitate simultaneous analysis of transcript and protein expression, transcript data were combined with cell-specific protein expression data obtained from indexed flow cytometry by centering each measure on its mean and scaling to unit variance. Initial investigations of the data were conducted via Principal Components Analysis (PCA), using the two principal components that accounted for the greatest variation in the data to search for patterns related to patient identity and tetramer specificity. We then conducted cut-tree hierarchical clustering with Ward's minimum variance method on the first two principal components in order to further investigate potential expression similarities among groups of cells, visually confirming the consistent separation of clusters by overlaying cluster membership on the PCA plot. We employed a sequential approach whereby we expanded the number of clusters iteratively to search for the largest value for which expression differences among putative clusters most closely resembled the published expression profiles of known CD8<sup>+</sup> T cell subsets. Whereas two clusters broadly recapitulated differences typically observed between exhausted and non-exhausted CD8<sup>+</sup> T cells, three clusters revealed an effector subset and a dysfunctional subset within the non-exhausted cluster, resulting in three broad functional groups supported by the literature: exhausted cells,

effectors, and dysfunctional cells. Additional iterations of dendrogram cutting revealed putative subdivisions of various clusters, but we were unable to find literature supporting the biological relevance of these potential subpopulations. Heatmaps were generated using the R package NMF (80) with missing data points excluded, and rather than using the center-scaled data, the raw protein expression data were re-scaled to the full range of the Et data in order to visualize the heatmap using an absolute metric.

## **Methylation**

Genomic DNA (100 ng) was subjected to bisulfite (BS) treatment using the EZ DNA methylation Gold kit (Zymo Research), which converts all unmethylated cytosines to uracils while protecting methylated cytosines from the deamination reaction. To perform loci-specific methylation analysis, bisulfite-modified DNA was PCR amplified with locus-specific primers for *IFN $\gamma$* , *TCF7*, and *TBX21*. The PCR product was gel extracted using the Zymoclean Gel DNA Recovery Kit (Zymo Research) and ligated overnight at 4°C to the pGEMT easy vector using T4 DNA ligase following the manufacturer's protocol (pGEM T vector system-I, Promega). XL-Gold ultracompetent bacteria (Stratagene) were transformed with the ligated DNA and spread on LB agar plates containing Ampicillin, X-Gal, and IPTG and incubated for 16 hrs at 37°C. White colonies were selected and inoculated into 1ml of 2x LB broth, and incubated overnight at 37°C in a shaking incubator at 220 rpm. Plasmid DNA was isolated from the cultured bacteria using the Directpret 96 Miniprep Kit (Qiagen), and the genomic insert was Sanger sequenced.

Sequencing results were analyzed using the QUMA online server to assess the extent of methylation at the selected loci (81).

### **Code and Data availability**

Single-cell gene expression data have been submitted to the Gene Expression Omnibus (GSE130670) and single-cell protein data is provided in Table S8. All other sequencing data can be accessed via European Genome-Phenome Archive ([www.ebi.ac.uk/ega/search/site/PCGP](http://www.ebi.ac.uk/ega/search/site/PCGP)) and St Jude Pediatric Cancer (PeCan) Data Portal (<https://pecan.stjude.org/home>). The EGA numbers corresponding to the data in this manuscript are EGAD00001002654 and EGAS00001000514.

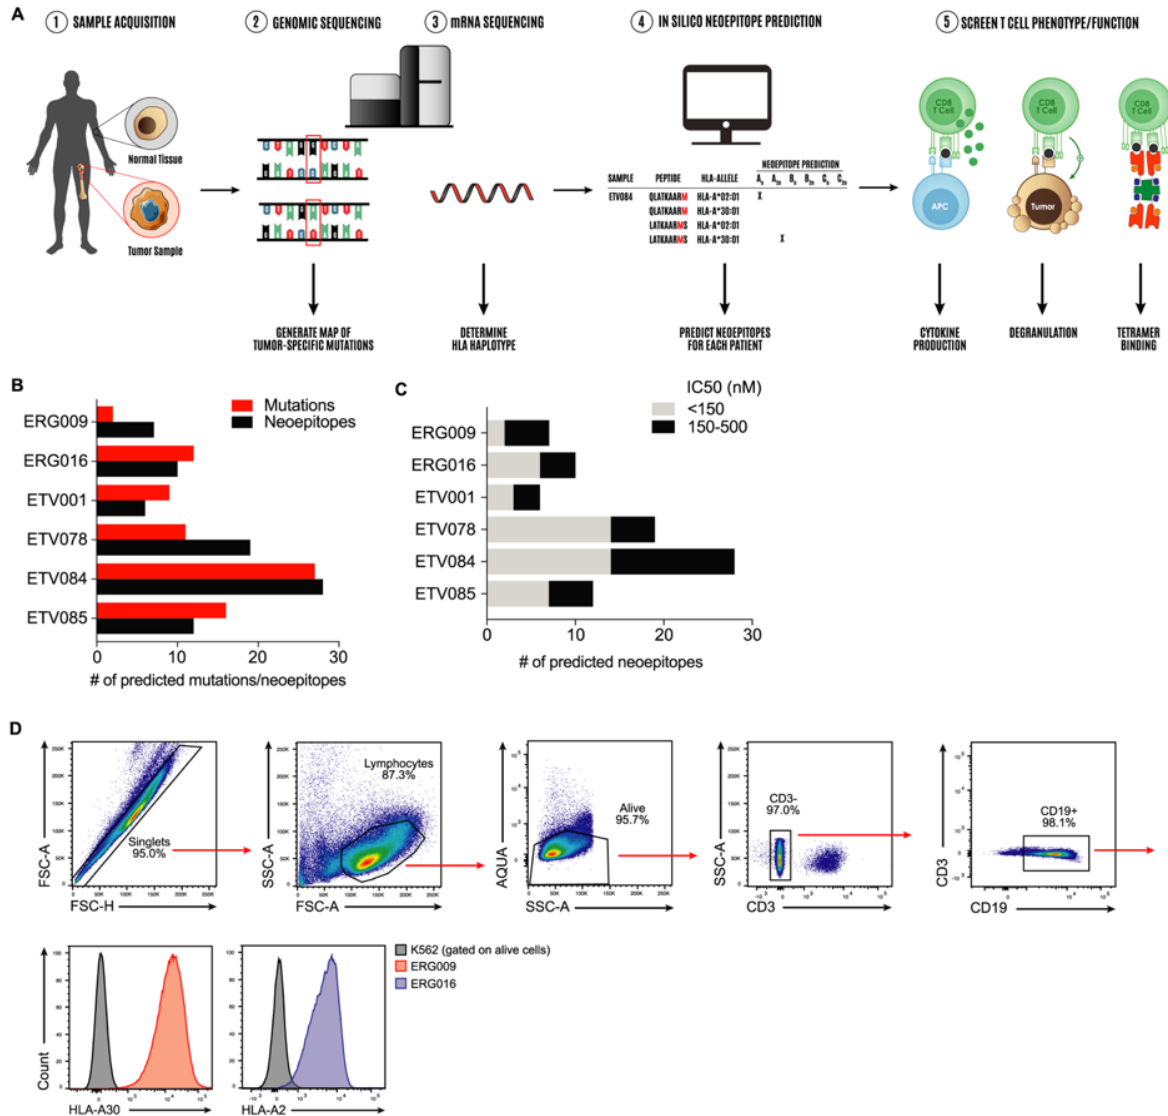

**Fig. S1. Experimental pipeline used to identify cancer neopeptides.** (A) (Step 1) Tumor material was analyzed against matched germline tissue to identify tumor-specific mutations using WES and/or WGS (Step 2). (Step 3) Expression of HLA class I genes was assessed from paired-end mRNA sequencing from tumor biopsies using OptiType. (Step 4) Neopeptide prediction was performed using NetMHCcons to determine the binding affinity between mutant peptides and patient-specific HLA class I alleles. (Step 5) Putative neoantigens and neopeptides were experimentally validated for their ability to induce tumor-specific CD8<sup>+</sup> T cell responses by tetramer binding, cytokine production, and degranulation. (B) Number of somatic mutations (red) and putative neopeptides (black) from patients with B-ALL generated from WES and WGS data. (C) Number of putative neopeptides with HLA binding affinity <150 nM (gray) and 150 to 500 nM (black) from patients with B-ALL. (D) Flow cytometric analysis of BMMCs depicting the frequency of CD19<sup>+</sup> tumor cells expressing HLA molecules for ERG009 (red histogram, HLA-A30) and ERG016 (blue histogram, HLA-A2).

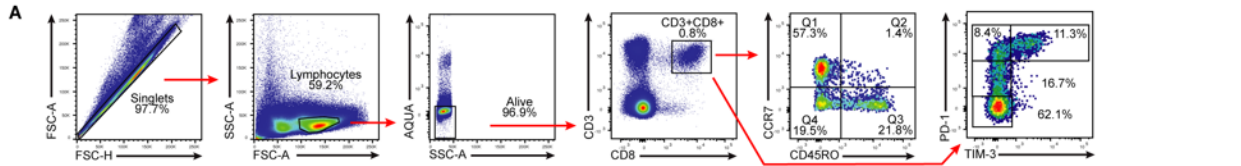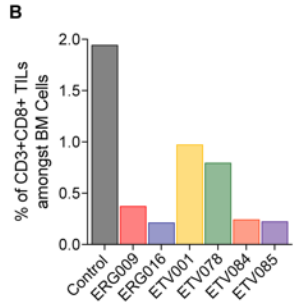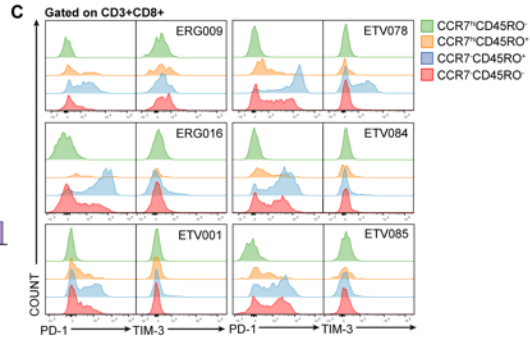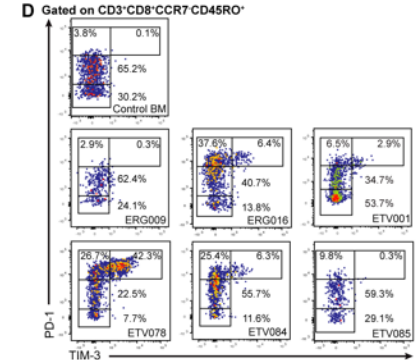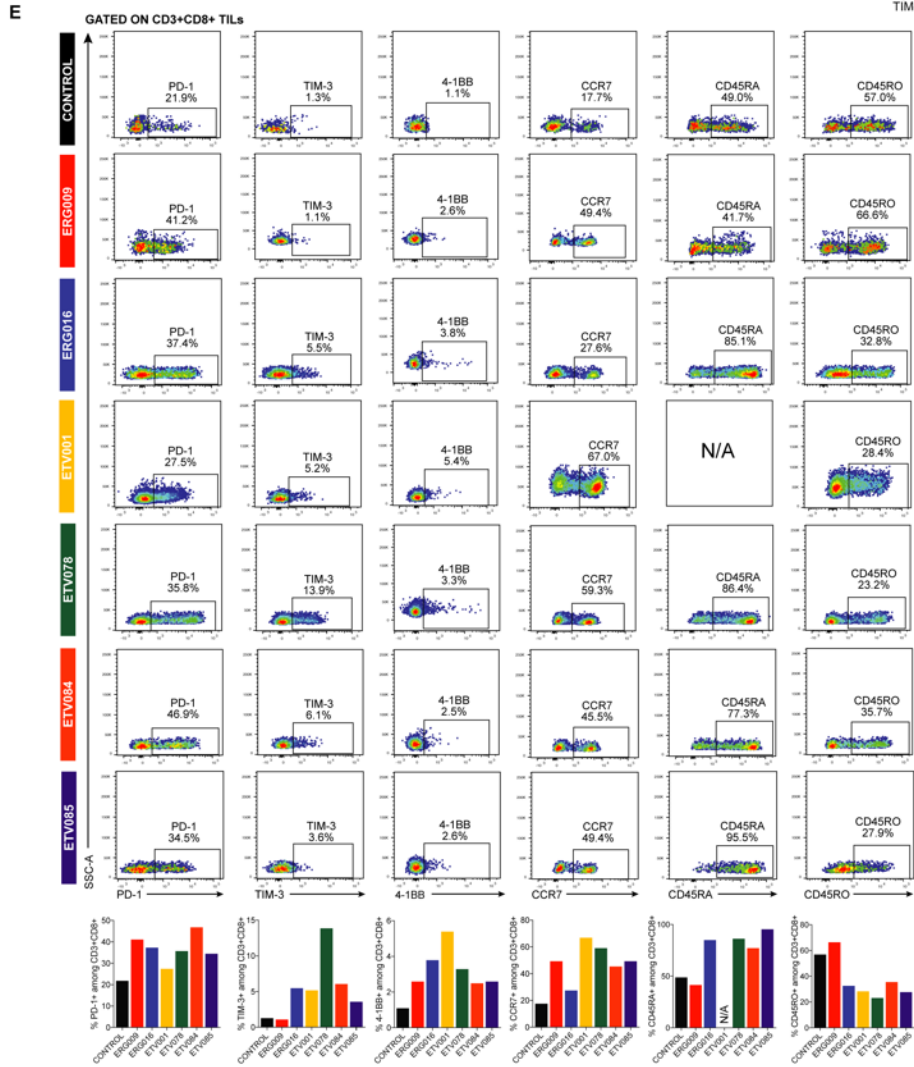

**Fig. S2. Phenotypic characterization of CD8<sup>+</sup> tumor infiltrating lymphocytes from human bone marrow samples.** (A) Flow cytometric analysis of one representative patient depicting the gating strategy used to characterize the differentiation status (CCR7 and CD45RO expression), PD-1 expression, and TIM-3 expression. (B) Frequency of CD8<sup>+</sup> T cells among total bone marrow cells from a healthy donor (control) and patient bone marrow samples. (C) Overlaid histogram plots show expression of PD-1 and TIM-3 in different CD3<sup>+</sup>CD8<sup>+</sup> TIL subsets. CD8<sup>+</sup> T cell subsets were defined as follows: TN cells, CD3<sup>+</sup>CD8<sup>+</sup>CCR7<sup>+</sup>CD45RO<sup>-</sup>; TCM cells, CD3<sup>+</sup>CD8<sup>+</sup>CCR7<sup>+</sup>CD45RO<sup>+</sup>; TEM cells, CD3<sup>+</sup>CD8<sup>+</sup>CCR7<sup>-</sup>CD45RO<sup>+</sup>; TEFF/EMRA cells, CD3<sup>+</sup>CD8<sup>+</sup>CCR7<sup>-</sup>CD45RO<sup>-</sup>. (D) Flow cytometric analysis of PD-1 and TIM-3 on TEM CD8<sup>+</sup> lymphocytes from a healthy donor (control) or patient bone marrow samples. (E) Flow dot plots depicting the expression of PD-1, TIM-3, 4-1BB, CCR7, CD45RA, and CD45RO on CD3<sup>+</sup>CD8<sup>+</sup> TILs from healthy donor (control) and patient bone marrow samples. Summary frequency graphs (bottom) depict the differential expression of each marker between healthy donor and patient samples. Bone marrow from a single patient (ETV001) was not stained for marker CD45RA.

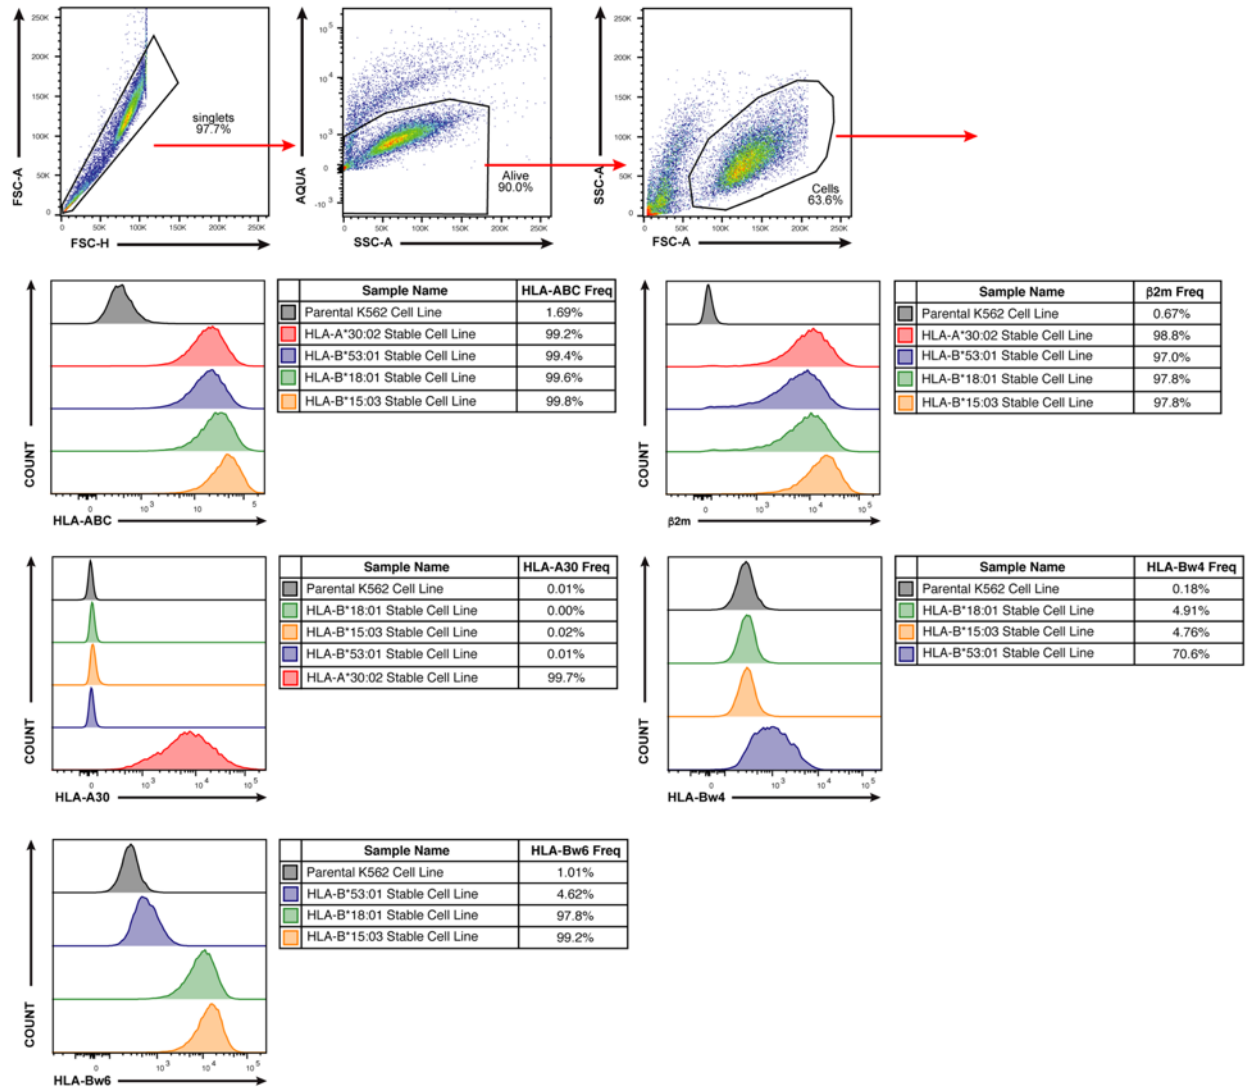

**Fig. S3. Generation of aAPCs expressing single patient-specific HLA class I molecules.**

Representative gating strategy used to identify HLA expression patterns among single HLA transduced K562 cells using monoclonal antibodies against β2-microglobulin, pan HLA-A,B,C molecules, HLA-A30, HLA-Bw4, or HLA-Bw6. Overlaid histogram plots show expression of HLA-A\*30:02, HLA-B\*15:03, HLA-B\*18:01, and HLA-B\*53:01 between the parental K562 cell line, and single HLA class I expressing stable cell lines (aAPCs).



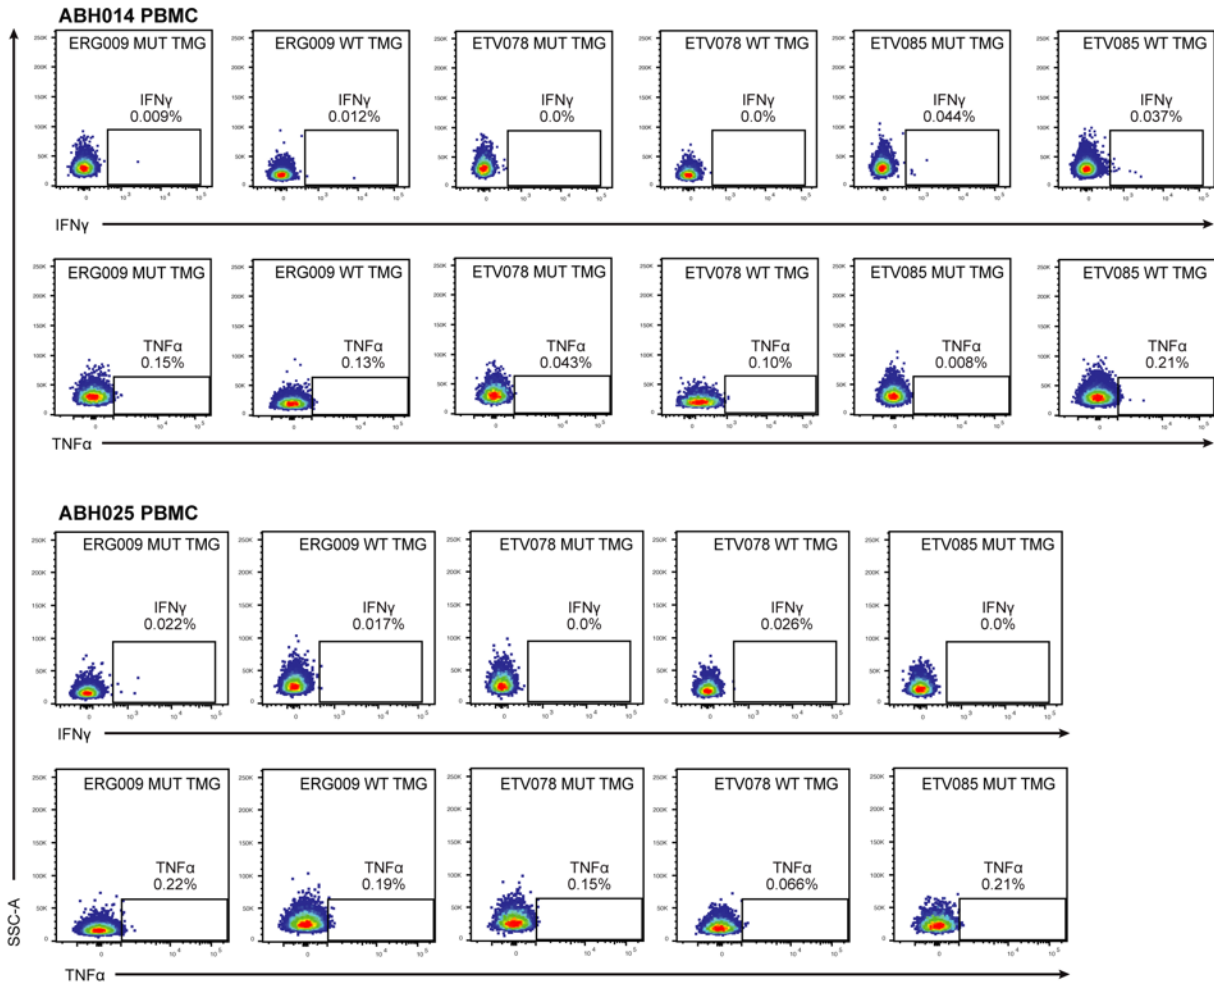

**Fig. S4. Healthy donors exhibit negligible responses against endogenous neoantigens.** Enriched CD8<sup>+</sup> T cells from healthy donor PBMCs (ABH014 PBMC and ABH025 PBMC) were cultured overnight in GT-T551 T cell culture media supplemented with rhIL-2 (300 IU/mL). Following overnight incubation, enriched CD8<sup>+</sup> T cells were co-cultured with RNA-transfected tumor cells from three patients at a 1:5 effector to target ratio in complete RPMI media for a total of 12 hours. Co-cultured CD8<sup>+</sup> T cells were subsequently subjected to intracellular flow cytometric analysis, and the frequency cytokine producing cells was determined. Flow dot plots depict the frequency IFN $\gamma$ - and TNF $\alpha$ -positive CD8<sup>+</sup> T cells.

ERG009

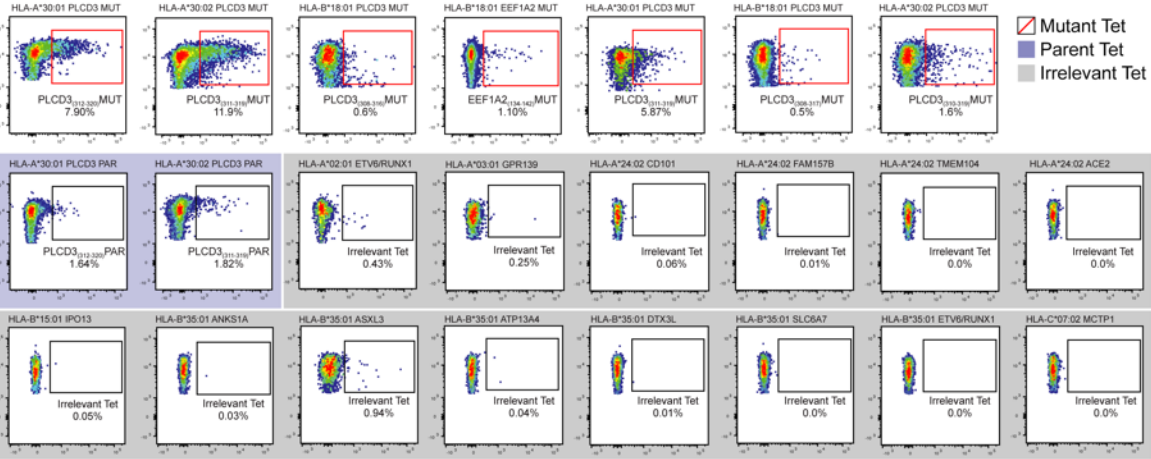

ETV078

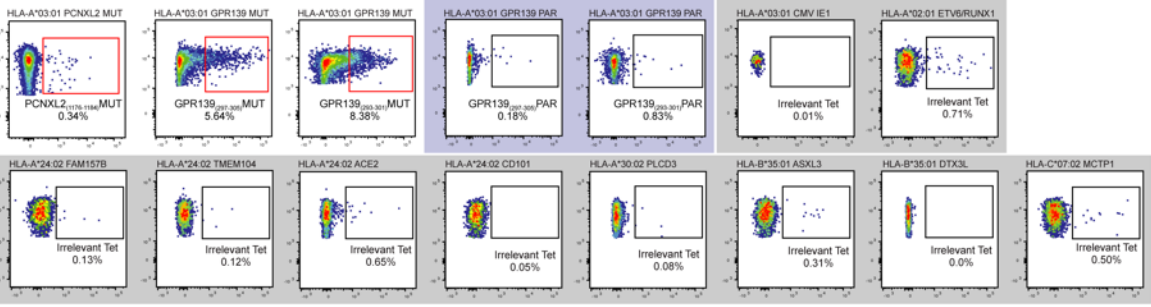

ETV001

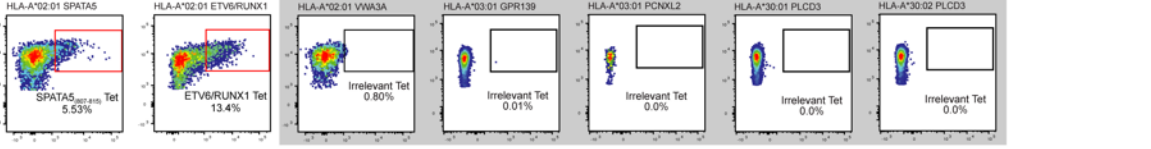

ERG016

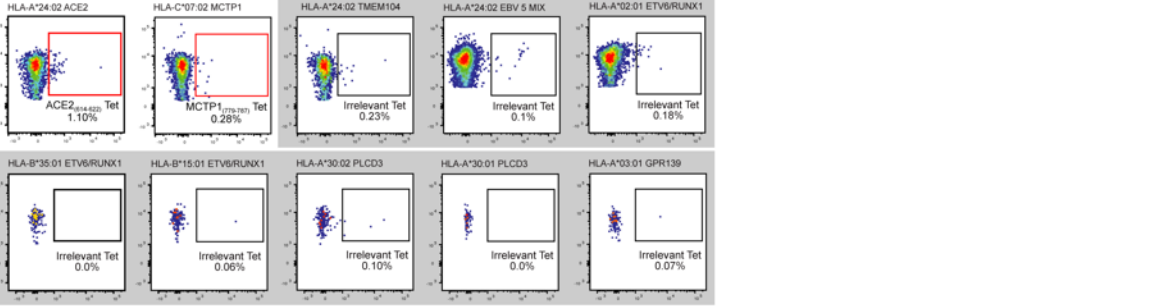

ETV084

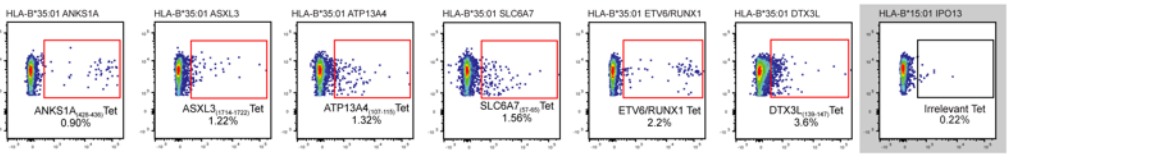

ETV085

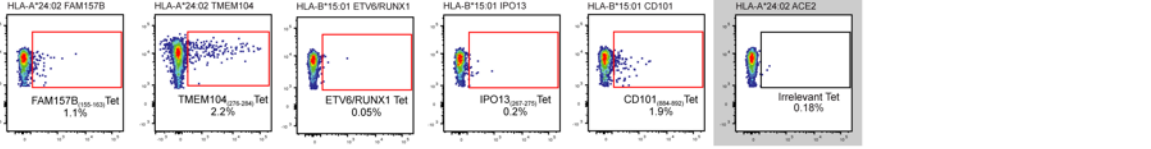

TETRAMER

Mutant Tet  
 Parent Tet  
 Irrelevant Tet

**Fig. S5. Neoepitope tetramers are patient-specific and exhibit negligible nonspecific binding.** Bone marrow cells from each patient were independently stained using an antibody cocktail and either an irrelevant (either nonself-antigen bound to patient-specific HLA or mutated neoantigen from a different patient), parent (wild-type self-peptide bound to patient-specific HLA), or mutant (cancer neoantigen bound to patient-specific HLA) tetramers. Flow dot plots depict the frequency of CD8<sup>+</sup> TILs binding either a parent (blue shaded dot plots), irrelevant (gray shaded dot plots), or mutant (dot plots without shading) tetramer across all patients. Above each dot plot is a label indicating the specific tetramer (HLA allele and peptide) used for staining.

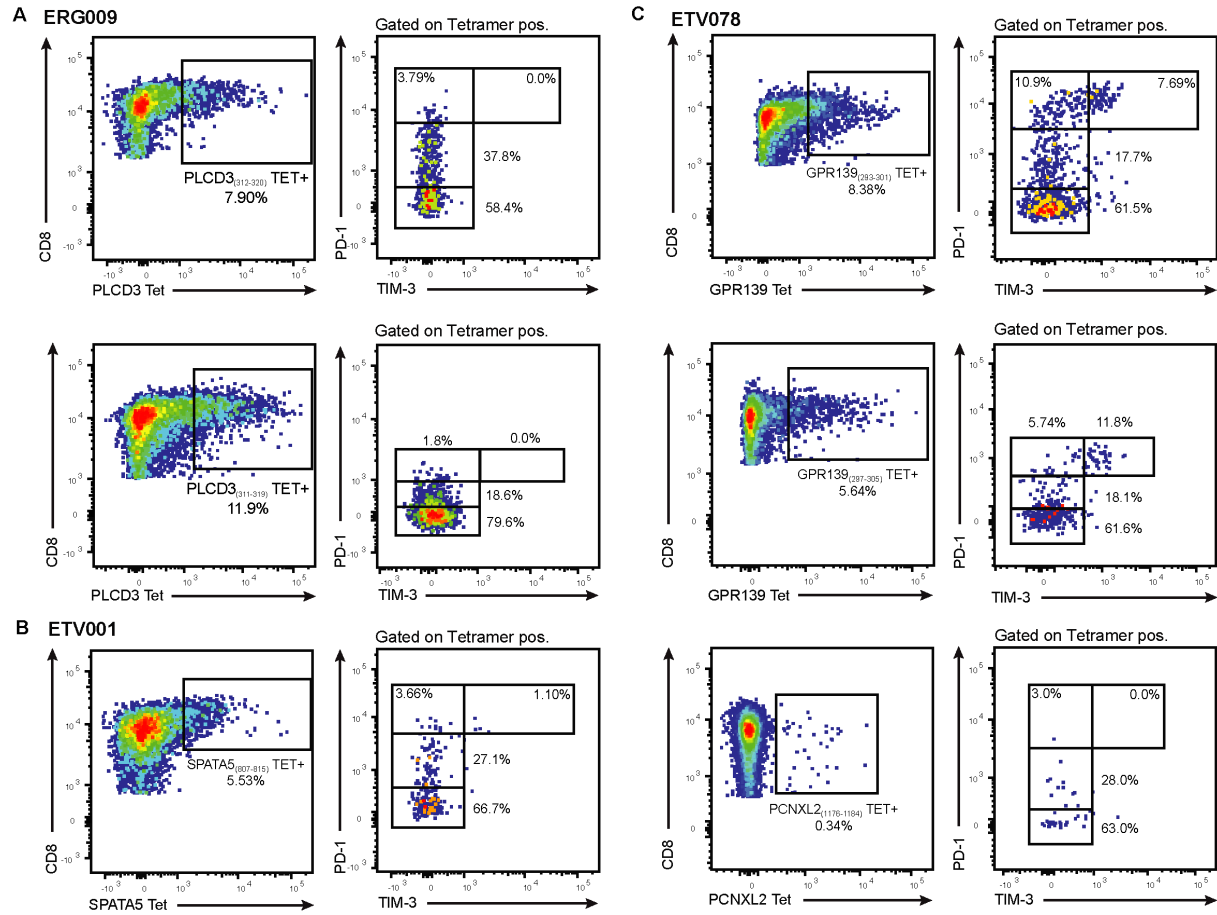

**Fig. S6. Phenotypic characterization of neopeptide-specific CD8<sup>+</sup> TILs.** PD-1<sup>low</sup>, PD-1<sup>mid</sup>, PD-1<sup>high</sup>, and PD-1<sup>high</sup>/TIM-3<sup>high</sup> expression on tetramer-positive CD3<sup>+</sup>CD8<sup>+</sup> TILs from patients ERG009 (A), ETV001 (B), and ETV078 (C) determined by flow cytometric analysis.

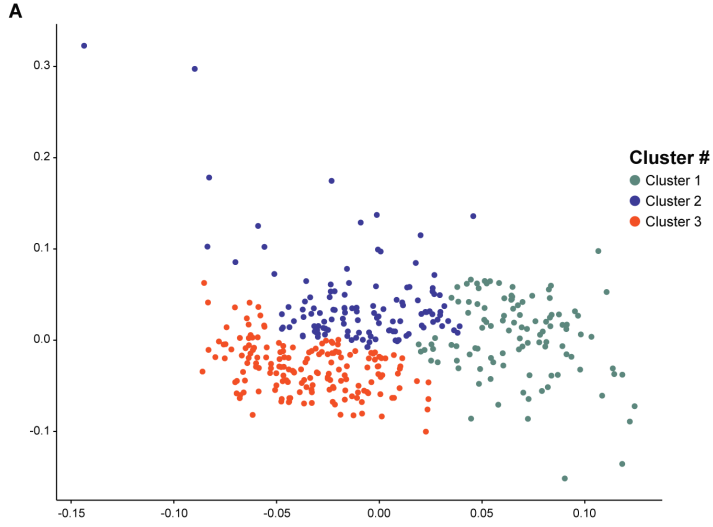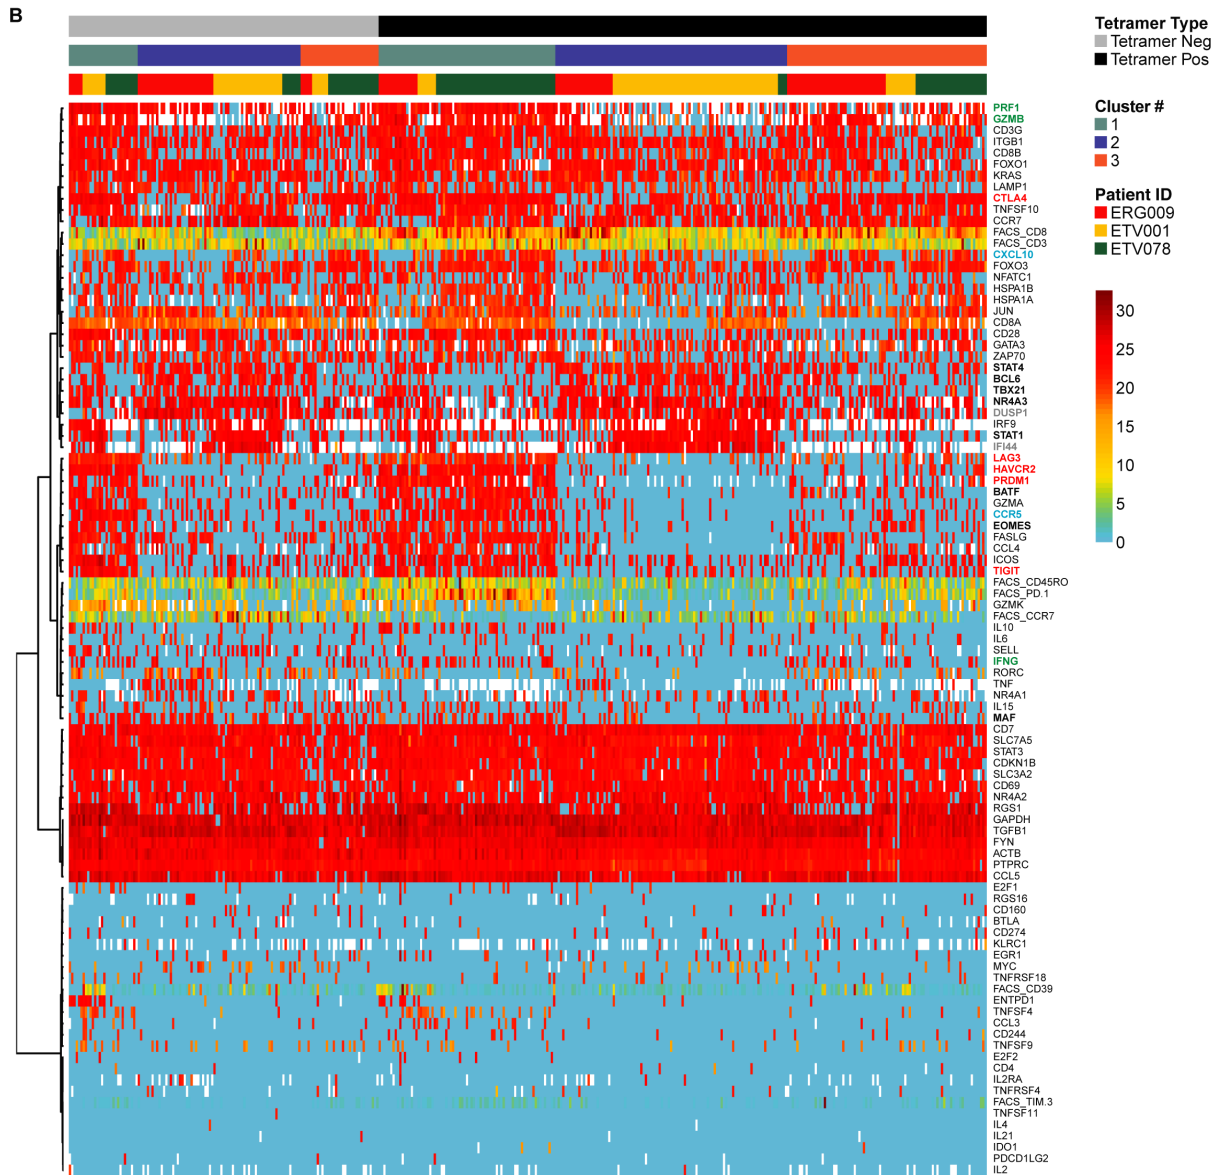

**Fig. S7. Patient-specific transcriptional profiles.** (A) Projection of principal components from single-cell gene-expression data derived from tetramer-negative and tetramer-positive sorted CD45RO<sup>+</sup>CD8<sup>+</sup> TIL subsets from patients ERG009, ETV001, and ETV078. Each circle represents an individual cell and each color represents the corresponding cluster number. (B) Heatmap visualizing unscaled expression of genes (transcript expression threshold values; Et) and scaled surface protein data (MFI) for sorted single-cell tetramer-negative and tetramer-positive CD45RO<sup>+</sup>CD8<sup>+</sup> TILs. Top margin color bars represent, from top to bottom, tetramer type, hierarchical cluster number (clusters 1-3), and patient IDs (ERG009, ETV001, and ETV078), respectively. Bolded gene name colors represent: transcription factors (black), inhibitory receptors (red), functional molecules (green), chemokine/chemokine receptors (blue), and transcriptional regulators (gray).

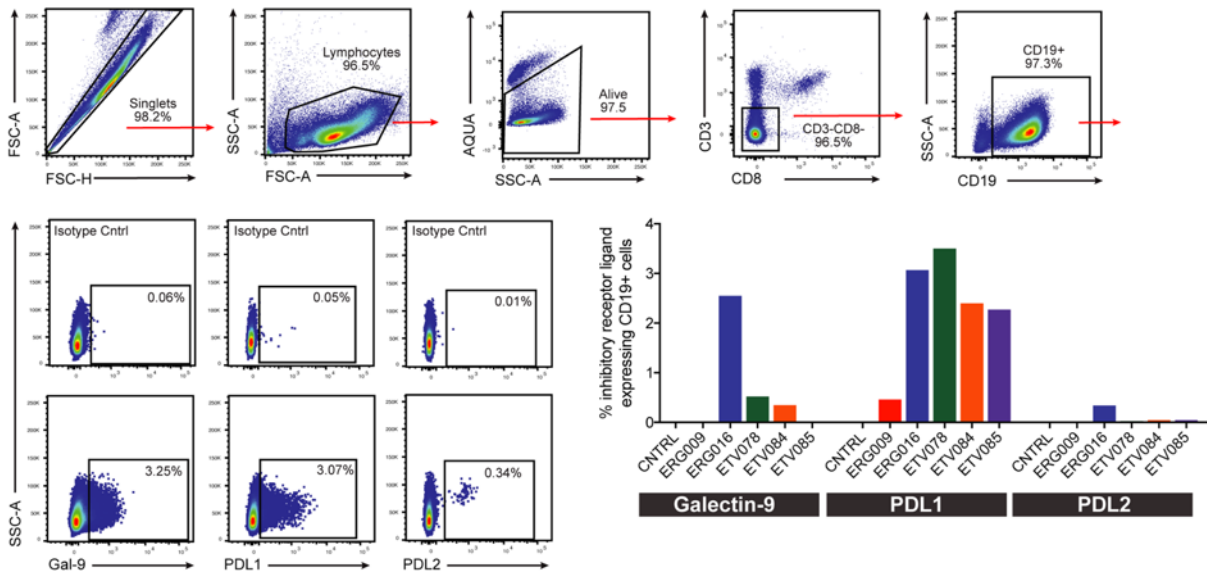

**Fig. S8. Phenotypic characterization of patient-specific CD19<sup>+</sup> tumor cells.** Galectin-9, PDL1, and PDL2 co-inhibitory receptor ligand expression on CD19<sup>+</sup> tumor cells from ERG009, ERG016, ETV078, ETV084, and ETV085 or CD19<sup>+</sup> BMMCs from control samples determined by flow cytometric analysis.

**Table S1. Patient ALL subtypes**

| PCGP ID  | Sample Type | ALL Subtype                     | Comments                                                                                                                             | Rearrangement (fusion) | Prevalence (%) | Prognosis                   |
|----------|-------------|---------------------------------|--------------------------------------------------------------------------------------------------------------------------------------|------------------------|----------------|-----------------------------|
| SJETV001 | Diagnostic  | ETV-associated ALL              | This is a form of ALL associated with a fusion between ETV-6 and AML-1; t(12;21)(p13;q22) translocation encoding ETV6-RUNX1          | ETV6-RUNX1             | 15-25          | Excellent prognosis         |
| SJETV022 | Diagnostic  |                                 |                                                                                                                                      |                        |                |                             |
| SJETV026 | Diagnostic  |                                 |                                                                                                                                      |                        |                |                             |
| SJETV035 | Diagnostic  |                                 |                                                                                                                                      |                        |                |                             |
| SJETV078 | Diagnostic  |                                 |                                                                                                                                      |                        |                |                             |
| SJETV084 | Diagnostic  |                                 |                                                                                                                                      |                        |                |                             |
| SJETV085 | Diagnostic  |                                 |                                                                                                                                      |                        |                |                             |
| SJETV096 | Diagnostic  |                                 |                                                                                                                                      |                        |                |                             |
| SJETV098 | Diagnostic  |                                 |                                                                                                                                      |                        |                |                             |
| SJERG009 | Diagnostic  | ETS-Related Gene-Associated ALL | ALL with alterations in ERG; typically a distinct gene expression profile with the majority of patients having a focal ERG deletions | IGH-DUX4               | ~7             | Typically favorable outcome |
| SJERG016 | Diagnostic  |                                 |                                                                                                                                      |                        |                |                             |



**Table S2. FPKM values for HLA genes**

|                 | Gene       |            |            | Tumor Milieu              |                      |              |
|-----------------|------------|------------|------------|---------------------------|----------------------|--------------|
|                 | HLA-A      | HLA-B      | HLA-C      | % of Blasts (tumor cells) | % of Monocytic cells | % of T cells |
| <b>SJERG009</b> | 206.764636 | 620.381172 | 411.862947 | 89.0%                     | 1.0%                 | 2.0%         |
| <b>SJERG016</b> | 111.185572 | 216.26332  | 132.588667 | 89.0%                     | 2.0%                 | 1.0%         |
| <b>SJETV001</b> | 306.695398 | 468.978469 | 385.35994  | 83.0%                     | 2.0%                 | 3.0%         |
| <b>SJETV078</b> | 466.678669 | 587.476285 | 703.273614 | 86.0%                     | 1.0%                 | 2.5%         |
| <b>SJETV084</b> | 129.479783 | 251.819536 | 234.751251 | 93.0%                     | 3.5%                 | 1.0%         |
| <b>SJETV085</b> | 205.053111 | 309.947074 | 326.763993 | 82.0%                     | 1.0%                 | 1.0%         |

**Table S3. Patient-specific neopeptides**

| PCGP ID            | HLA Haplotype                                         | Variant          | Mutated Gene                                                                        | Predicted High Affinity Neopeptides | Corresponding HLA        | Predicted Affinity (IC <sub>50</sub> ) |
|--------------------|-------------------------------------------------------|------------------|-------------------------------------------------------------------------------------|-------------------------------------|--------------------------|----------------------------------------|
| SJETV001           | A*02:01 A*33:03<br>B*58:01 B*27:05<br>C*03:02 C*02:02 | MCTP1_A899V      | Multiple C2 and Transmembrane Domain Containing 1                                   | NILDEVVVF                           | HLA-C03:02               | 311.19                                 |
|                    |                                                       | SPATA5_S812C     | Spermatogenesis Associated 5                                                        | <b>KIQFHCMPV</b>                    | <b>HLA-A02:01</b>        | <b>8.29</b>                            |
|                    |                                                       | ETV6-RUNX1       | ETS Variant 6/Run1 Related Transcription Factor 1                                   | <b>RIAE<b>C</b>ILGM</b>             | <b>HLA-A02:01</b>        | <b>192.18</b>                          |
|                    |                                                       | TECPR2_E1307A    | Tectonin Beta-propeller Repeale Containing 2                                        | TAWAHVPLG<br>WAHVPLGQA              | HLA-C03:02<br>HLA-C03:02 | 80.28<br>70.31<br>396.32               |
| SJETV078           | A*34:02 A*03:01<br>B*53:01 B*15:03<br>C*02:10 C*04:01 | AHNAK_S5863F     | Neuroblast Differentiation-associated Protein AHNAK Isoform 1                       | LASKKSRFL                           | HLA-B15:03               | 66.92                                  |
|                    |                                                       | BTBD16_V298M     | BTB Domain Containing 16                                                            | QAIPVYETM                           | HLA-B15:03               | 60.38                                  |
|                    |                                                       |                  |                                                                                     | PTYETMTMF                           | HLA-B15:03               | 138.91                                 |
|                    |                                                       |                  |                                                                                     | TMTFFKSF                            | HLA-B15:03               | 3.17                                   |
|                    |                                                       | GPR139_A298T     | G Protein-couple Receptor 139                                                       | FRTMAAATL                           | HLA-B15:03               | 247.81                                 |
|                    |                                                       |                  |                                                                                     | RTMAAATLK                           | HLA-A34:02               | 41.19                                  |
|                    |                                                       |                  |                                                                                     | RTMAAATLK                           | <b>HLA-A03:01</b>        | <b>21.03</b>                           |
|                    |                                                       |                  |                                                                                     | ATLKAFFK                            | <b>HLA-A03:01</b>        | <b>93.08</b>                           |
|                    |                                                       |                  |                                                                                     | ATLKAFFK                            | HLA-A34:02               | 71.22                                  |
|                    |                                                       | ITPR1_V656L      | Inositol 1,4,5-Triphosphate Receptor, Type 1                                        | MAATLTKAF                           | HLA-B53:01               | 121.34                                 |
|                    |                                                       |                  |                                                                                     | MAATLTKAF                           | HLA-B15:03               | 22.19                                  |
|                    |                                                       |                  |                                                                                     | KLLSRFEF                            | HLA-B15:03               | 34.77                                  |
|                    |                                                       |                  |                                                                                     | HLMWLERLY                           | HLA-A34:02               | 374.58                                 |
|                    |                                                       |                  |                                                                                     | HLMWLERLY                           | HLA-B15:03               | 232.24                                 |
| HLMWLERLY          | <b>HLA-A03:01</b>                                     |                  |                                                                                     | <b>390.37</b>                       |                          |                                        |
| LMWLERLYV          | HLA-B15:03                                            |                  |                                                                                     | 141.95                              |                          |                                        |
| PCNXL2_F1180L      | Pecanex-like 2 (Drosophila)                           | EPEWTEPEW        | HLA-B53:01                                                                          | 51.89                               |                          |                                        |
|                    |                                                       | LVPWYFWGK        | HLA-A34:02                                                                          | 338.02                              |                          |                                        |
| PRRC2B_R923W       | Proline-Rich Coiled-Coil 2B                           | GKTFQNSVF        | HLA-B15:03                                                                          | 28.78                               |                          |                                        |
| SCD_E240K          | Stearoyl-CoA Desaturase                               | FPLTASKVL        | HLA-B42:01                                                                          | 12.78                               |                          |                                        |
| SJETV084           | A*02:02 A*02:02<br>B*42:01 B*35:01<br>C*17:01 C*04:01 | ANKS1A_E434K     | Ankyrin Repeat and SAM Domain-containing Protein 1A                                 | <b>FPLTASKVL</b>                    | <b>HLA-B35:01</b>        | <b>20.69</b>                           |
|                    |                                                       | ARHGAP12_S114L   | Rho GTPase Activating Protein 12                                                    | KLPELLSFG                           | HLA-A02:02               | 207.3                                  |
|                    |                                                       | ASXL3_E1718K     | Additional Sex Combs Like 3 (Drosophila)                                            | SPMEKAISL                           | HLA-B42:01               | 21.25                                  |
|                    |                                                       |                  |                                                                                     | <b>SPMEKAISL</b>                    | <b>HLA-B35:01</b>        | <b>96.68</b>                           |
|                    |                                                       | ATP13A4_L109F    | ATPase type 13A4; Probable Cation-Transporting ATPase 13A4                          | FGLTPDHPF                           | HLA-B35:01               | 153.95                                 |
|                    |                                                       |                  |                                                                                     | GLTPDHPFM                           | HLA-A02:02               | 279.13                                 |
|                    |                                                       |                  |                                                                                     | <b>HPFMDEEY</b>                     | <b>HLA-B35:01</b>        | <b>4.22</b>                            |
|                    |                                                       | CCDC108_R1124Q   | Coiled-Coil Domain-Containing Protein 108                                           | FMTDEEYII                           | HLA-A02:02               | 6.94                                   |
|                    |                                                       | DTX3L_D141H      | Detlex E3 Ubiquitin Ligase 3L                                                       | ITKHLWRLL                           | HLA-A02:02               | 476.88                                 |
|                    |                                                       | KIAA1715_R253Q   | Lunapark, ER Junction Formation Factor                                              | VTALHNCNL                           | HLA-A02:02               | 319.56                                 |
|                    |                                                       | KRT7_E263Q       | Keratin 7                                                                           | <b>TAHLNCNLF</b>                    | <b>HLA-B35:01</b>        | <b>348.45</b>                          |
|                    |                                                       | NNMT_L45V        | Nicotinamide N-Methyltransferase                                                    | ILPREOGAL                           | HLA-A02:02               | 312.72                                 |
|                    |                                                       |                  |                                                                                     | DLDGIAQV                            | HLA-A02:02               | 253.23                                 |
|                    |                                                       | OR5H15_L45M      | Olfactory Receptor Family 5 Subfamily H Member 15                                   | ILKHLKNV                            | HLA-A02:02               | 153.12                                 |
|                    |                                                       | PDS5B_D86H       | Sister Chromatid Cohesion Protein PDS5 Homolog B                                    | HLLKNVFKI                           | HLA-A02:02               | 126.7                                  |
|                    |                                                       | RBCK1_L130V      | RanBP-type and C3HC4-type Zinc Finger-Containing Protein 1 Isoform 2                | TIMGNLGMI                           | HLA-A02:02               | 363.86                                 |
|                    |                                                       | SEPT14_S82P      | Septin 14                                                                           | LVAACLAHI                           | HLA-A02:02               | 21.14                                  |
|                    |                                                       | SERPINA6_E138Q   | Serpin Family A Member 6                                                            | VLSARNTSL                           | HLA-A02:02               | 15.03                                  |
|                    |                                                       | SLC6A7_R62C      | Solute Carrier Family 6 Member 7                                                    | KPSHFYSNV                           | HLA-B42:01               | 74.97                                  |
|                    |                                                       | SULT4A1_T205M    | Sulfotransferase Family 4A Member 1                                                 | FLDGSLGLL                           | HLA-A02:02               | 3.93                                   |
| USH2A_S1007L       | Usher Syndrome 2A                                     | <b>LGNVWCFPY</b> | <b>HLA-B35:01</b>                                                                   | <b>107.72</b>                       |                          |                                        |
| ETV6-RUNX1         | ETS Variant 6/Run1 Related Transcription Factor 1     | MMVEQLARF        | HLA-A02:02                                                                          | 165.16                              |                          |                                        |
|                    |                                                       | MMVEQLARF        | HLA-B35:01                                                                          | 140.42                              |                          |                                        |
| SJETV085           | A*24:02 A*68:02<br>B*53:01 B*15:01<br>C*03:03 C*04:01 | AZI1_M681I       | 5-Azacytidine Induced 1; Centrosomal Protein of 131 kDa Isoform A                   | HLLGALNET                           | HLA-A02:02               | 265.87                                 |
|                    |                                                       | CD101_S889F      | CD101 Molecule                                                                      | <b>MPIGRIAC</b>                     | <b>HLA-B35:01</b>        | <b>492.62</b>                          |
|                    |                                                       | FAM157B_L156F    | Family With Sequence Similarity 157 Mmember B                                       | <b>MPIGRIAC</b>                     | HLA-B42:01               | 228.5                                  |
|                    |                                                       | GRIN3A_A401T     | Glutamate Receptor, Ionotropic, N-Methyl-D-Aspartate 3A                             | <b>RIAE<b>C</b>ILGM</b>             | HLA-A02:02               | 93.08                                  |
|                    |                                                       | IPO13_I267M      | Importin 13                                                                         | ELISATEKA                           | HLA-A68:02               | 104.28                                 |
|                    |                                                       | SPIRE1_R332W     | Protein Spire Homolog 1 Isoform B                                                   | <b>HLHCYRSSF</b>                    | <b>HLA-B15:01</b>        | <b>28.93</b>                           |
|                    |                                                       | TMEM104_V281I    | Transmembrane Protein 104                                                           | CYRSSFTDF                           | HLA-A24:02               | 54.78                                  |
|                    |                                                       |                  |                                                                                     | RFLDHLDLL                           | <b>HLA-A24:02</b>        | <b>178.16</b>                          |
|                    |                                                       |                  |                                                                                     | LVARAVTTA                           | HLA-A68:02               | 339.15                                 |
|                    |                                                       | ETV6-RUNX1       | ETS Variant 6/Run1 Related Transcription Factor 1                                   | RAVTTATMI                           | HLA-C03:03               | 59.73                                  |
| MSQPDAQRY          | <b>HLA-B15:01</b>                                     | <b>267.31</b>    |                                                                                     |                                     |                          |                                        |
| MVNGDIPPV          | HLA-B53:01                                            | 22.32            |                                                                                     |                                     |                          |                                        |
| LFQVCYISF          | <b>HLA-A24:02</b>                                     | <b>110.68</b>    |                                                                                     |                                     |                          |                                        |
| FGVCYISFM          | HLA-A68:02                                            | 241.2            |                                                                                     |                                     |                          |                                        |
| FGVCYISFM          | HLA-C03:03                                            | 72.97            |                                                                                     |                                     |                          |                                        |
| RIAE <b>C</b> ILGM | <b>HLA-B15:01</b>                                     | <b>291.48</b>    |                                                                                     |                                     |                          |                                        |
| SJERG009           | A*30:02 A*30:01<br>B*18:01 B*13:02<br>C*06:02 C*05:01 | PLCD3_D314H      | Phospholipase C, Delta 3                                                            | HELMTLHGF                           | <b>HLA-B18:01</b>        | <b>12.78</b>                           |
|                    |                                                       | EEF1A2_T142M     | Eukaryotic Translation Elongation Factor 1 Alpha 2                                  | TLHGFMVYL                           | HLA-A30:01               | 398.91                                 |
|                    |                                                       |                  |                                                                                     | MTLHGFMVY                           | HLA-A30:01               | 398.91                                 |
|                    |                                                       |                  |                                                                                     | MTLHGFMVY                           | HLA-A30:02               | 32.24                                  |
|                    |                                                       |                  |                                                                                     | *HEMLTLHGFM                         | HLA-B18:01               | 187.05                                 |
|                    |                                                       |                  |                                                                                     | *LMTLHGFMVY                         | HLA-A30:02               | 127.39                                 |
|                    |                                                       | REHALLAYM        | <b>HLA-B18:01</b>                                                                   | <b>412.08</b>                       |                          |                                        |
| SJERG016           | A*24:02 A*02:07<br>B*58:01 B*40:01<br>C*03:02 C*07:02 | MCTP1_R783H      | Multiple C2 and Transmembrane Domain-Containing Protein 1 Isoform L                 | FIRMKHCVM                           | HLA-C03:02               | 26.17                                  |
|                    |                                                       | PIGZ_P455S       | Phosphatidylinositol Glycan Anchor Biosynthesis, Class Z; GPI Mannosyltransferase 4 | IRMKHCVMV                           | <b>HLA-C07:02</b>        | <b>342.84</b>                          |
|                    |                                                       |                  |                                                                                     | RMKHCVMVL                           | HLA-C03:02               | 342.57                                 |
|                    |                                                       | ACE2_D615Y       | Angiotensin I Converting Enzyme 2                                                   | TSTHYTLF                            | HLA-C03:02               | 99.38                                  |
|                    |                                                       |                  |                                                                                     | TSTHYTLF                            | HLA-B58:01               | 45.09                                  |
|                    |                                                       | FMOD_I117T       | Fibromodulin                                                                        | STSTHYTL                            | HLA-C03:02               | 284.78                                 |
| NUDT10_A62V        | Nudix Hydrolyase 10                                   | STDWSPYAY        | HLA-C03:02                                                                          | 130.01                              |                          |                                        |
| A*YQSKVRI          | <b>HLA-A24:02</b>                                     | <b>91.58</b>     |                                                                                     |                                     |                          |                                        |
| FQNNQTTSI          | HLA-C03:02                                            | 27.49            |                                                                                     |                                     |                          |                                        |
| EPEPGGAVV          | HLA-B40:01                                            | 359.95           |                                                                                     |                                     |                          |                                        |

\*denotes neopeptides with 10mer amino acids  
 Bold denotes neopeptides with corresponding tetramers that were generated and tested  
 For ETV6-RUNX1 neopeptides, red color indicates the amino acids corresponding to ETV6 and the blue color indicates the amino acids corresponding to RUNX1

**Table S4. Tetramers used for specificity assays**

| Patient ID   | Variant       | Peptide       | Peptide Length | HLA Allele | Patient-specific HLA? | Tetramer Type |
|--------------|---------------|---------------|----------------|------------|-----------------------|---------------|
| ERG009       | EEF1A2_T142M  | REHALLAYM     | 9              | HLA-B18:01 | Yes                   | Mutant        |
|              | PLCD3_D314H   | HELMTLHGF     | 9              | HLA-B18:01 | Yes                   | Mutant        |
|              | PLCD3_D314H   | MTLHGFMFY     | 9              | HLA-A30:01 | Yes                   | Mutant        |
|              | PLCD3_D314H   | TLHGFMMYL     | 9              | HLA-A30:01 | Yes                   | Mutant        |
|              | PLCD3_D314H   | MTLHGFMFY     | 9              | HLA-A30:02 | Yes                   | Mutant        |
|              | PLCD3_D314H   | HELMTLHGFM    | 10             | HLA-B18:01 | Yes                   | Mutant        |
|              | PLCD3_D314H   | LMTLHGFMFY    | 10             | HLA-A30:02 | Yes                   | Mutant        |
|              | PLCD3_D314H   | TLDGFMMYL     | 9              | HLA-A30:01 | Yes                   | Parent        |
|              | PLCD3_D314H   | MTLDGFMMY     | 9              | HLA-A30:02 | Yes                   | Parent        |
|              | ETV6-RUNX1    | RIAECILGM     | 9              | HLA-A02:01 | No                    | Irrelevant    |
|              | GPR139_A298T  | ATTLKAFFK     | 9              | HLA-A03:01 | No                    | Irrelevant    |
|              | CD101_S889F   | HLHCYRSSF     | 9              | HLA-B15:01 | No                    | Irrelevant    |
|              | FAM157B_L156F | RFLHDLHLL     | 9              | HLA-A24:02 | No                    | Irrelevant    |
|              | TMEM104_V281I | LFGVCIYSF     | 9              | HLA-A24:02 | No                    | Irrelevant    |
|              | ACE2_D615Y    | AYQSIKVR      | 9              | HLA-A24:02 | No                    | Irrelevant    |
|              | IPO13_I267M   | MSQPDAQRY     | 9              | HLA-B15:01 | No                    | Irrelevant    |
|              | ANKS1A_E434K  | FPLTASKVL     | 9              | HLA-B35:01 | No                    | Irrelevant    |
|              | ASXL3_E1718K  | SPMEKAISL     | 9              | HLA-B35:01 | No                    | Irrelevant    |
|              | ATP13A4_L109F | HPFMTDEEY     | 9              | HLA-B35:01 | No                    | Irrelevant    |
|              | DTX3L_D141H   | TAHLNCLNF     | 9              | HLA-B35:01 | No                    | Irrelevant    |
| SLC6A7_R62C  | LGNVWCOPY     | 9             | HLA-B35:01     | No         | Irrelevant            |               |
| ETV6-RUNX1   | MPIGRIAC      | 9             | HLA-B35:01     | No         | Irrelevant            |               |
| MCTP1_R783H  | IRMKHCVMV     | 9             | HLA-C07:02     | No         | Irrelevant            |               |
| ERG016       | ACE2_D615Y    | AYQSIKVR      | 9              | HLA-A24:02 | Yes                   | Mutant        |
|              | MCTP1_R783H   | IRMKHCVMV     | 9              | HLA-C07:02 | Yes                   | Mutant        |
|              | TMEM104_V281I | LFGVCIYSF     | 9              | HLA-A24:02 | Yes                   | Irrelevant    |
|              | EBV 5 Mix     | 5 peptide mix | 9              | HLA-A24:02 | Yes                   | Irrelevant    |
|              | ETV6-RUNX1    | RIAECILGM     | 9              | HLA-A02:01 | No                    | Irrelevant    |
|              | ETV6-RUNX1    | MPIGRIAC      | 9              | HLA-B35:01 | No                    | Irrelevant    |
|              | ETV6-RUNX1    | RIAECILGM     | 9              | HLA-B15:01 | No                    | Irrelevant    |
|              | PLCD3_D314H   | TLHGFMMYL     | 9              | HLA-A30:01 | No                    | Irrelevant    |
|              | PLCD3_D314H   | MTLHGFMFY     | 9              | HLA-A30:02 | No                    | Irrelevant    |
| GPR139_A298T | ATTLKAFFK     | 9             | HLA-A03:01     | No         | Irrelevant            |               |
| ETV001       | SPATA5_S812C  | KLQFHCMPV     | 9              | HLA-A02:01 | Yes                   | Mutant        |
|              | ETV6-RUNX1    | RIAECILGM     | 9              | HLA-A02:01 | Yes                   | Mutant        |
|              | VWA3A_V955I   | RLFGTILES     | 9              | HLA-A02:01 | Yes                   | Irrelevant    |
|              | GPR139_A298T  | ATTLKAFFK     | 9              | HLA-A03:01 | No                    | Irrelevant    |
|              | PCNXL2_F1180L | HLMWLERLY     | 9              | HLA-A03:01 | No                    | Irrelevant    |
|              | PLCD3_D314H   | TLHGFMMYL     | 9              | HLA-A30:01 | No                    | Irrelevant    |
| PLCD3_D314H  | MTLHGFMFY     | 9             | HLA-A30:02     | No         | Irrelevant            |               |
| ETV078       | GPR139_A298T  | RTMAATLTK     | 9              | HLA-A03:01 | Yes                   | Mutant        |
|              | GPR139_A298T  | ATTLKAFFK     | 9              | HLA-A03:01 | Yes                   | Mutant        |
|              | PCNXL2_F1180L | HLMWLERLY     | 9              | HLA-A03:01 | Yes                   | Mutant        |
|              | GPR139_A298T  | RTMAATLTK     | 9              | HLA-A03:01 | Yes                   | Parent        |
|              | GPR139_A298T  | AATLKAFFK     | 9              | HLA-A03:01 | Yes                   | Parent        |
|              | CMV IE1       | KLGGALQAK     | 9              | HLA-A03:01 | Yes                   | Irrelevant    |
|              | ETV6-RUNX1    | RIAECILGM     | 9              | HLA-A02:01 | No                    | Irrelevant    |
|              | FAM157B_L156F | RFLHDLHLL     | 9              | HLA-A24:02 | No                    | Irrelevant    |
|              | TMEM104_V281I | LFGVCIYSF     | 9              | HLA-A24:02 | No                    | Irrelevant    |
|              | ACE2_D615Y    | AYQSIKVR      | 9              | HLA-A24:02 | No                    | Irrelevant    |
|              | CD101_S889F   | HLHCYRSSF     | 9              | HLA-B15:01 | No                    | Irrelevant    |
|              | PLCD3_D314H   | MTLHGFMFY     | 9              | HLA-A30:02 | No                    | Irrelevant    |
| ASXL3_E1718K | SPMEKAISL     | 9             | HLA-B35:01     | No         | Irrelevant            |               |
| DTX3L_D141H  | TAHLNCLNF     | 9             | HLA-B35:01     | No         | Irrelevant            |               |
| ETV084       | ANKS1A_E434K  | FPLTASKVL     | 9              | HLA-B35:01 | Yes                   | Mutant        |
|              | ASXL3_E1718K  | SPMEKAISL     | 9              | HLA-B35:01 | Yes                   | Mutant        |
|              | ATP13A4_L109F | HPFMTDEEY     | 9              | HLA-B35:01 | Yes                   | Mutant        |
|              | DTX3L_D141H   | TAHLNCLNF     | 9              | HLA-B35:01 | Yes                   | Mutant        |
|              | SLC6A7_R62C   | LGNVWCOPY     | 9              | HLA-B35:01 | Yes                   | Mutant        |
|              | ETV6-RUNX1    | MPIGRIAC      | 9              | HLA-B35:01 | Yes                   | Mutant        |
|              | IPO13_I267M   | MSQPDAQRY     | 9              | HLA-B15:01 | No                    | Irrelevant    |
| ETV085       | CD101_S889F   | HLHCYRSSF     | 9              | HLA-B15:01 | Yes                   | Mutant        |
|              | FAM157B_L156F | RFLHDLHLL     | 9              | HLA-A24:02 | Yes                   | Mutant        |
|              | IPO13_I267M   | MSQPDAQRY     | 9              | HLA-B15:01 | Yes                   | Mutant        |
|              | TMEM104_V281I | LFGVCIYSF     | 9              | HLA-A24:02 | Yes                   | Mutant        |
|              | ETV6-RUNX1    | RIAECILGM     | 9              | HLA-B15:01 | Yes                   | Mutant        |
| ACE2_D615Y   | AYQSIKVR      | 9             | HLA-A24:02     | Yes        | Irrelevant            |               |

**Table S5. Fluidigm primer list**

| Target   | Forward Primer Sequence  | Reverse Primer Sequence   |
|----------|--------------------------|---------------------------|
| ACTB     | GCCGCTTCCCTCCA           | CTCGTCGCCACATAGGAA        |
| BATF     | AGCAGTGACTCCAGCTTCA      | CTCTTCTGGCGGCAATAC        |
| BCL6     | GATGGAGCATGTTGGGACAC     | AGGAGGCTTGTGGCAGAAA       |
| BTLA     | TCCCATATCTGGACATCTGGAAC  | CTCCTGTAAAGTGGAGTGTCA     |
| CCL3     | GAGCAGCCAGTGTCCAA        | AGTCCAGGTCTGCTGACATA      |
| CCL4     | GTAGCTGCCTTCTGCTCTCC     | TCTACCACAAAGTTGCGAGGAA    |
| CCL5     | CCCTCGCTGCATCTCA         | GGGCAATGTAGGCAAAAGCA      |
| CCR5     | TGAGACATCCGTTCCCTTACA    | TGGCAGGGCTCCGATGTATA      |
| CCR7     | TGAGGTACGGACGATTACA      | CGTCTTCTTGGAGCACAAA       |
| CD160    | CTCAGTTCAGGCTTCTTACA     | TCTTTTGGCACAAGGCTTAC      |
| CD244    | AACCACAGCCCTTCTTCAA      | GAGCAGGGTCTGGGCTTTA       |
| CD274    | ACCAGCCGCTTCTGT          | TCAGCAATGCCAGTAGGTCATGAAT |
| CD28     | GTGGAGTCTGGCTTGTATA      | GAGCCTGTCTCTTACTTCC       |
| CD3G     | GCCCAATGACCAGCTCTA       | TTCTCTCAACTGGTTTCC        |
| CD4      | AAAGTTGCATCAGGAAGTGAACC  | CCCACACCTCACAGGTCAAA      |
| CD69     | TCACCCATGGAAAGTGGTCAA    | ACACACTTGTACAGACCTGTGA    |
| CD7      | GCCATCACGGAGTCAATGT      | AGCATCTGTGCCATCTCTGG      |
| CD8A     | CCATCATGTACTTCAGCCACTTCG | GCTGCGACGCGATGGT          |
| CD8B     | CCGGAAGACAGTGGCATCTA     | CTGGGCACTGGTGGGAA         |
| CDKN1B   | GCAATGCGCAGGAATAAGGAA    | TTGGGAAACGCTGTAAMACA      |
| CTLA4    | CATGGACACGGGACTCTACA     | AATCTGGTTCCTGTTGCTA       |
| CXCL10   | GCTGTACCTGCATCAGCATT     | CTGGATTACAGCATCTCTCTCAC   |
| DUSP1    | AGACATCAGCTCTGGTTCA      | CAGTGGACAAACACCTTCC       |
| E2F1     | AGCTCATTGCCAAGAGTCCAA    | TCTGGGTCAACCCCTCAA        |
| E2F2     | TTCAAGCACCTGACTGAGGAC    | AGTTGCCAACAGCACGGATA      |
| EGR1     | AACCTCAGGCGGACAC         | CAGCACCTTCTGTTGTCA        |
| ENTPD1   | AGGTGCCTATGGCTGGATTAC    | GTCCAAAGCTCAAAGGTTTCC     |
| EOMES    | CTGTGGCAAAGCCGACAATA     | CTCATCCAGTGGAAACAGTA      |
| FASLG    | CTGAGGAAAGTGGCCAT        | ACAAGATACAGCCAGTTTCA      |
| FOXO1    | GGTGTCAAGCTCAGGGTTA      | TTCTCTCAGTCTCTGTGCA       |
| FOXO3    | AGTTCCTCGTATACCACCAA     | CCGAACCCGCTGTGTAAA        |
| FYN      | GAGCCATCTACATCTGTCAC     | TTCAGAGCTTCTCTCTCCA       |
| GAPDH    | GAACGGGAAGCTTGCATCAA     | ATCGCCCACTTGATTTTGG       |
| GATA3    | CACGGTGCAGAGGTACC        | AGGGTAGGGATCCATGAAGCA     |
| GZMA     | CCTCCGAGTGGAGAGAC        | GTGACCCCTCGGAAAACAC       |
| GZMB     | CTTCTCAACGACATATGCTAC    | CTGGGCTTGTGCTAGGTA        |
| GZMK     | ATCCACAGTGGGTGCTGAC      | AGAGTGTGCGCCTAAAACCA      |
| HAVCR2   | GGATCCAAATCCAGGCATAA     | CTTGGAAAGGCTGACGTGAA      |
| HSPA1A   | AGGCTTCCAGAGCGAAC        | GAGAAGACTCGGTCCTTCC       |
| HSPA1B   | CAAGGCTTCCAGAGCGAAC      | AAGACTCAGTCTCTCGAAC       |
| ICOS     | GCCAACTATTACTTGTGCAACC   | GAATTCAGTGGCAACAAA        |
| IDO1     | GGATGCATCACCATGGCATA     | TTGGCAGTAAGGAACAGCAA      |
| IFH4     | GGCTTTGGTGGGCACTAATA     | TGCCATCTTCCCGCTCTA        |
| IFNG     | ACTGCCAGGACCCATATGTAA    | GTTCATTATCCGCTACATCTGAA   |
| IL10     | CCGTGGAGCAGGTGAAGAA      | GTCAAACTCACTATGGCTTTGTA   |
| IL15     | GTCCGGAGATGCAAGTATTCA    | TCCTCACATTCTTGCATCCA      |
| IL2      | ACCAGGGACTTAATCAGCAA     | GCATATTCACATGAATGTTTCA    |
| IL21     | CTGAATTTCTGCCAGTCCA      | TTGTTCTGTATTTGCTGACTTA    |
| IL2RA    | TCCTGGGACAAACATGTCA      | GTCACTTGTTCGTTGTTTCC      |
| IL4      | CAGCTGATCCGATCTCCGAAA    | GTTGGCTTCTCACAGAGAC       |
| IL6      | AGAGCTGTGACAGATGAGTACAA  | GTTGGTCAAGGGTGGTTA        |
| IRF9     | CTCCAGCCATACTCCACGAAA    | GGAGCTGCTCCAGCAAGTA       |
| ITGB1    | GAATGTATACAAGCAGGCGCAA   | CGTGCAGAAGTAGCATTCC       |
| JUN      | AAGAACTCGACCTCTCAC       | TGGATTATCAGGCGCTCCA       |
| KLRC1    | AGCTTCTCAGGATTTCAAGGGAA  | GCTTCTCGAGCTGATGGTAA      |
| KRAS     | GGGAGGCTTTCTTTGTGTA      | ACTAGGACCATAGGTACATCTTCA  |
| LAG3     | TGGAGCTTTGGCTTTCAC       | GAGGGTGAATCCCTTGTCTA      |
| LAMP1    | TCCAGGCTTTCAAGTGGAA      | CCACAGCGATGGGATCA         |
| MAF      | TCGACGACCCCTTCTCC        | ATCACCTCCTCTGTGCTGAC      |
| MYC      | CCTGGTCTCCATGAGGA        | CCTGCCCTTTTCCACAGAAA      |
| NFATC1   | TCCTCTCAACACCAAGTCC      | AGGATCCGGCACAGTCAA        |
| NR4A1    | CCAGTTCGCGCTTCCA         | GCTTGGGTTTGAAGTAGCC       |
| NR4A2    | TGGCTGTGGGATGGTCAA       | TCTTCCGTTTCGAGGGCAA       |
| NR4A3    | ACGTGAAACCGATGTGAGTA     | ACCTCTCCTCCTTTCAGACTA     |
| PDCC1L2  | GGAATTGCACTTCCACGATA     | CACATTGTGCTGCTGCTA        |
| PRDM1    | CCTGGTACACAGGAGGAAAA     | TTGAGATTGCTGTGCTGCTA      |
| PRF1     | GTACAGCTTCAGCACTGACAC    | CTGGTGGAGGCTTGA           |
| PTPRC    | GTGGCTTAAACTTGGCATT      | GGGAAGGTGTTGGGCTT         |
| RGS1     | TGCCCTGTAAGCAGAAGAGATA   | TTCTCGAGTGGGAAAGTCAA      |
| RGS16    | TCGAGTGGGCGAGTAAACAC     | AGGTGGAACGACTCTCTCCA      |
| RORC     | CAAGACTCATGCCAAAGCA      | TTTCCACATGCTGGCTACAC      |
| SELL     | ACTATGGGCCAGTGTCA        | GTGAGTACAGTCCATGGTACCC    |
| SLC3A2   | TGGCTGAGTGGCAAAATATCAC   | GCTGAAGGTGGGAGGATTA       |
| SLC7A5   | TTCCGGGCTGTGGAAAA        | CCTGCATGAGTCTGACAC        |
| STAT1    | ATGCTGCCACAGAACGAA       | GCTGGCAAAATGGGTTCAA       |
| STAT3    | GGAAATATGGTGAAGGTGCTGAAC | CCGAGGTCAACTCCATGTCAA     |
| STAT4    | CAGTGTGGAGGTAAGGAA       | AGAGGCAGATCTGTGTTCAA      |
| TBX21    | GGGCTGCAACAATGTGAC       | CCGTCTTCACTCAACGATA       |
| TGFB1    | CTACTACGCCAAGGAGGTAC     | GCTGTGTACTCTGCTTGAAC      |
| TIGIT    | GTGGTGGTCCGCTGACTA       | TCTGTCCAGCTGATTTCTCC      |
| TNF      | CTTCTCAACCCGAGTGAC       | ACTGGAGCTGCCCTCA          |
| TNFRSF18 | GCTGCTGCCGATT            | GAATTCAGCTGGACACACA       |
| TNFRSF4  | AACGACGTGGTCACTCAA       | CACAGCTGCTCCGCTCAC        |
| TNFSF10  | AGAAGGAAGGCTTCAAGTAC     | CCTGGACCTCATATAGCC        |
| TNFSF11  | CTCAGCTTTTGTCTATCTCAC    | GGTACCAAGAGGACAGACTCAC    |
| TNFSF4   | CACATCGTATCTCGAATTCA     | TGATTTCACTCTTTTGGGAA      |
| TNFSF9   | CTTTCGCCGACGATCC         | ACCAGCTGCGCAACA           |
| ZAP70    | AGTGTCCACCCGACTGTAC      | CTGCTCCAGGTCAGGAA         |

**Table S6. Peptides for functional assays**

| Patient ID | Sample Type | Mutation Type | Variant       | Wild-type (parent) AA | Mutant AA | AA mutation position | Wild-type (parent) 15mer | Mutated 15mer    |
|------------|-------------|---------------|---------------|-----------------------|-----------|----------------------|--------------------------|------------------|
| SJERG009   | Diagnostic  | SNV           | EEF1A2_T142M  | T                     | M         | 142                  | GQTRHALLAYTLGV           | GQTRHALLAYMLGV   |
|            |             | SNV           | PLCD3_D314H   | D                     | H         | 314                  | KQHELMTLDFGMMYL          | KQHELMTLHGFMMLYL |
| SJERG016   | Diagnostic  | SNV           | ACE2_D615Y    | D                     | Y         | 615                  | GWSTDWSPYADQSIK          | GWSTDWSPYAYQSIK  |
|            |             | SNV           | FMOD_I117T    | I                     | T         | 117                  | SPYADQSIKVRISLK          | SPYAYQSIKVRISLK  |
|            |             | SNV           | MCTP1_R783H   | R                     | H         | 783                  | VYFFQNNQTSIQEG           | VYFFQNNQTSIQEG   |
|            |             | SNV           | NUDT10_A62V   | A                     | V         | 62                   | LRNFIRMKRCVMVLV          | LRNFIRMKRCVMVLV  |
|            |             | SNV           | PIGZ_P455S    | P                     | S         | 455                  | EPEEPPGGAAVREVV          | EPEEPPGGAAVREVV  |
| SJETV001   | Diagnostic  | SNV           | MCTP1_A899V   | A                     | V         | 899                  | PVLPSTPTHYTLLEF          | PVLPSTPTHYTLLEF  |
|            |             | SNV           | SPATA5_S812C  | S                     | C         | 812                  | VQNILDEVASFGERI          | VQNILDEVASFGERI  |
|            |             | SNV           | TECPR2_E1307A | E                     | A         | 1307                 | IFKLQFHSMPVSNV           | IFKLQFHSMPVSNV   |
|            |             | Fusion        | ETV6-RUNX1    | -                     | -         | -                    | PVGTAWEHVPGLOAC          | PVGTAWEHVPGLOAC  |
| SJETV078   | Diagnostic  | SNV           | AHNAK_S5863F  | S                     | F         | 5863                 | -                        | AMPIGRIAECLGMN   |
|            |             | SNV           | BTBD16_V298M  | V                     | M         | 298                  | GVSLASKKSRLSSSS          | GVSLASKKSRLFSSS  |
|            |             | SNV           | GPR139_A298T  | A                     | T         | 298                  | IQAIPTYETVMTFFK          | IQAIPTYETVMTFFK  |
|            |             | SNV           | ITPR1_V656L   | V                     | L         | 656                  | IPITYETVMTFFKSP          | IPITYETVMTFFKSP  |
|            |             | SNV           | PCNXL2_F1180L | F                     | L         | 1180                 | KRFRMTMAATLKAFF          | KRFRMTMAATLKAFF  |
|            |             | SNV           | PRRC2B_R923W  | R                     | W         | 923                  | FRMTMAATLKAFFKC          | FRMTMAATLKAFFKC  |
|            |             | SNV           | SCD_E240K     | E                     | K         | 240                  | LIETKLLSRFEFEG           | LIETKLLSRFEFEG   |
| SJETV084   | Diagnostic  | SNV           | ANKS1A_E434K  | E                     | K         | 434                  | VAHLMWFERLYWVWQ          | VAHLMWFERLYWVWQ  |
|            |             | SNV           | ASXL3_E1718K  | E                     | K         | 1718                 | SSEPEWTPERPSSSS          | SSEPEWTPERPSSSS  |
|            |             | SNV           | ATP13A4_L109F | L                     | F         | 109                  | PTLVPWYFWGETFQN          | PTLVPWYFWGETFQN  |
|            |             | SNV           | PDS5B_D86H    | D                     | H         | 86                   | YFWGETFQNSVVFAT          | YFWGETFQNSVVFAT  |
|            |             | SNV           | RBCK1_L130V   | L                     | V         | 130                  | KYFPLTASVLSMRP           | KYFPLTASVLSMRP   |
|            |             | Fusion        | ETV6-RUNX1    | -                     | -         | -                    | STSSPMKAIKSLATD          | STSSPMKAIKSLATD  |
| SJETV085   | Diagnostic  | SNV           | AZ11_M681I    | M                     | I         | 681                  | PDHPLMTDEEYIINR          | PDHPLMTDEEYIINR  |
|            |             | SNV           | CD101_S889F   | S                     | F         | 889                  | RLLVACCLADIFRIY          | RLLVACCLADIFRIY  |
|            |             | SNV           | FAM157B_L156F | L                     | F         | 156                  | AYLYLLSARNTSLNP          | AYLYLLSARNTSLNP  |
|            |             | SNV           | GRIN3A_A401T  | A                     | T         | 401                  | -                        | AMPIGRIAECLGMN   |
|            |             | SNV           | IPO13_I267M   | I                     | M         | 267                  | KKLKLMSATEKARR           | KKLKLMSATEKARR   |
|            |             | SNV           | SPIRE1_R332W  | R                     | W         | 332                  | RHLHCYRSSSTDFVL          | RHLHCYRSSSTDFVL  |
|            |             | SNV           | TMEM104_V281I | V                     | I         | 281                  | EFFRLLHDLHLLAFA          | EFFRLLHDLHLLAFA  |
|            |             | Fusion        | ETV6-RUNX1    | -                     | -         | -                    | ELVARAVATATMIQP          | ELVARAVATATMIQP  |

For ETV6-RUNX1, red color indicates the amino acids corresponding to ETV6 and the blue color indicates the amino acids corresponding to RUNX1

**Table S7. Mutant allele frequencies (MAF) for sequenced mutations**

| Patient ID | Sample Type | Mutation Type | Variant        | Mutation in Normal | Total in Normal | Mutation in Tumor | Total in Tumor | MAF      | Blast Frequency in Tumor | MAF Relative To Blast Frequency |
|------------|-------------|---------------|----------------|--------------------|-----------------|-------------------|----------------|----------|--------------------------|---------------------------------|
| ERG009     | DIAGNOSIS   | SNV           | EEF1A2 T142M   | 0                  | 34              | 6                 | 40             | 0.15     | 0.89                     | 0.168539326                     |
| ERG009     | DIAGNOSIS   | SNV           | PLCD3 D314H    | 1                  | 24              | 14                | 41             | 0.341463 | 0.89                     | 0.383666758                     |
| ERG016     | DIAGNOSIS   | SNV           | ACE2 D615Y     | 0                  | 42              | 35                | 63             | 0.555556 | 0.89                     | 0.624219725                     |
| ERG016     | DIAGNOSIS   | SNV           | APBA2 K495N    | 0                  | 40              | 23                | 46             | 0.5      | 0.89                     | 0.561797753                     |
| ERG016     | DIAGNOSIS   | SNV           | OPRM1 R359C    | 0                  | 32              | 24                | 60             | 0.4      | 0.89                     | 0.449438202                     |
| ERG016     | DIAGNOSIS   | SNV           | ST14 W828L     | 0                  | 180             | 14                | 240            | 0.058333 | 0.89                     | 0.065543071                     |
| ERG016     | DIAGNOSIS   | SNV           | TBL1XR1 S461F  | 0                  | 39              | 51                | 52             | 0.980769 | 0.89                     | 1.1019879                       |
| ERG016     | DIAGNOSIS   | SNV           | TM6C Q240R     | 0                  | 10              | 16                | 34             | 0.470588 | 0.89                     | 0.528750826                     |
| ERG016     | DIAGNOSIS   | SNV           | TMEM177 D267G  | 0                  | 29              | 11                | 35             | 0.314286 | 0.89                     | 0.353130016                     |
| ERG016     | DIAGNOSIS   | SNV           | USP5 C451F     | 0                  | 40              | 21                | 55             | 0.381818 | 0.89                     | 0.429009193                     |
| ERG016     | DIAGNOSIS   | SNV           | FMOD I117T     | 0                  | 29              | 23                | 43             | 0.534884 | 0.89                     | 0.600992945                     |
| ERG016     | DIAGNOSIS   | SNV           | MCTP1 R783H    | 1                  | 40              | 36                | 73             | 0.493151 | 0.89                     | 0.554101893                     |
| ERG016     | DIAGNOSIS   | SNV           | NUDT10 A62V    | 0                  | 10              | 10                | 18             | 0.555556 | 0.89                     | 0.624219725                     |
| ERG016     | DIAGNOSIS   | SNV           | PKGZ P455S     | 0                  | 113             | 12                | 130            | 0.092308 | 0.89                     | 0.103716508                     |
| ETV001     | DIAGNOSIS   | SNV           | MCTP1 A899V    | 0                  | 47              | 5                 | 30             | 0.166667 | 0.83                     | 0.200803213                     |
| ETV001     | DIAGNOSIS   | SNV           | SPATA5 S812C   | 0                  | 44              | 6                 | 40             | 0.15     | 0.83                     | 0.180722892                     |
| ETV001     | DIAGNOSIS   | SNV           | BLID G9C       | 0                  | 46              | 6                 | 52             | 0.115385 | 0.83                     | 0.139017609                     |
| ETV001     | DIAGNOSIS   | SNV           | CDHR2 V1246I   | 0                  | 27              | 27                | 45             | 0.6      | 0.83                     | 0.722891566                     |
| ETV001     | DIAGNOSIS   | SNV           | GTF3C3 H267D   | 0                  | 55              | 8                 | 49             | 0.163265 | 0.83                     | 0.196705188                     |
| ETV001     | DIAGNOSIS   | SNV           | ROCK1 A1064V   | 0                  | 37              | 9                 | 53             | 0.169811 | 0.83                     | 0.204591953                     |
| ETV001     | DIAGNOSIS   | SNV           | WDR17 E222K    | 0                  | 35              | 8                 | 49             | 0.163265 | 0.83                     | 0.196705188                     |
| ETV001     | DIAGNOSIS   | SNV           | WHSC1 E1099K   | 0                  | 26              | 12                | 130            | 0.092308 | 0.83                     | 0.111214087                     |
| ETV001     | DIAGNOSIS   | SNV           | TECPR2 E1307A  | 0                  | 22              | 2                 | 9              | 0.222222 | 0.83                     | 0.267737617                     |
| ETV001     | DIAGNOSIS   | Fusion        | ETV6-RUNX1     | NA                 | NA              | NA                | NA             | NA       | NA                       | NA                              |
| ETV078     | DIAGNOSIS   | SNV           | AHNAK S5863F   | 0                  | 27              | 7                 | 26             | 0.269231 | 0.86                     | 0.313059034                     |
| ETV078     | DIAGNOSIS   | SNV           | BTBD16 V298M   | 0                  | 46              | 26                | 62             | 0.419355 | 0.86                     | 0.487621905                     |
| ETV078     | DIAGNOSIS   | SNV           | KCNK1 A308E    | 0                  | 36              | 7                 | 19             | 0.368421 | 0.86                     | 0.428396573                     |
| ETV078     | DIAGNOSIS   | SNV           | GPR139 A298T   | 0                  | 37              | 10                | 26             | 0.384615 | 0.86                     | 0.447227191                     |
| ETV078     | DIAGNOSIS   | SNV           | KRAS G12D      | 0                  | 51              | 12                | 48             | 0.25     | 0.86                     | 0.290697674                     |
| ETV078     | DIAGNOSIS   | SNV           | ITPR1 V656L    | 0                  | 47              | 14                | 39             | 0.358974 | 0.86                     | 0.417412045                     |
| ETV078     | DIAGNOSIS   | SNV           | PCNXL2 F1180L  | 0                  | 35              | 30                | 51             | 0.588235 | 0.86                     | 0.683994528                     |
| ETV078     | DIAGNOSIS   | SNV           | PRRC2B R923W   | 0                  | 21              | 12                | 21             | 0.571429 | 0.86                     | 0.664451827                     |
| ETV078     | DIAGNOSIS   | SNV           | SLC24A2 A134V  | 0                  | 34              | 17                | 42             | 0.404762 | 0.86                     | 0.470653378                     |
| ETV078     | DIAGNOSIS   | SNV           | WHSC1 E1099K   | 0                  | 32              | 11                | 30             | 0.366667 | 0.86                     | 0.426356589                     |
| ETV078     | DIAGNOSIS   | SNV           | SCD E240K      | 0                  | 35              | 12                | 24             | 0.5      | 0.86                     | 0.581395349                     |
| ETV078     | DIAGNOSIS   | Fusion        | ETV6-RUNX1     | NA                 | NA              | NA                | NA             | NA       | NA                       | NA                              |
| ETV084     | DIAGNOSIS   | SNV           | ANKS1A E434K   | 0                  | 32              | 18                | 40             | 0.45     | 0.93                     | 0.483870968                     |
| ETV084     | DIAGNOSIS   | SNV           | ASXL3 E1718K   | 0                  | 31              | 16                | 36             | 0.444444 | 0.93                     | 0.477897252                     |
| ETV084     | DIAGNOSIS   | SNV           | ATP13A4 L109F  | 0                  | 32              | 33                | 51             | 0.647059 | 0.93                     | 0.695762176                     |
| ETV084     | DIAGNOSIS   | SNV           | PDS5B D86H     | 0                  | 30              | 16                | 40             | 0.4      | 0.93                     | 0.430107527                     |
| ETV084     | DIAGNOSIS   | SNV           | ARHGAP12 S114L | 0                  | 39              | 12                | 39             | 0.307692 | 0.93                     | 0.330851944                     |
| ETV084     | DIAGNOSIS   | SNV           | ARL15 E82Q     | 0                  | 45              | 26                | 52             | 0.5      | 0.93                     | 0.537634409                     |
| ETV084     | DIAGNOSIS   | SNV           | ATP13A4 P105S  | 0                  | 30              | 37                | 54             | 0.685185 | 0.93                     | 0.736758264                     |
| ETV084     | DIAGNOSIS   | SNV           | BRPF1 D344H    | 0                  | 21              | 9                 | 27             | 0.333333 | 0.93                     | 0.358422939                     |
| ETV084     | DIAGNOSIS   | SNV           | CC2D1A Q695E   | 0                  | 22              | 18                | 38             | 0.473684 | 0.93                     | 0.509337861                     |
| ETV084     | DIAGNOSIS   | SNV           | CCDC108 R1124Q | 0                  | 39              | 15                | 38             | 0.394737 | 0.93                     | 0.424448217                     |
| ETV084     | DIAGNOSIS   | SNV           | DTX3L D141H    | 0                  | 24              | 20                | 48             | 0.416667 | 0.93                     | 0.448028674                     |
| ETV084     | DIAGNOSIS   | SNV           | KIAA1715 R253Q | 0                  | 29              | 10                | 57             | 0.175439 | 0.93                     | 0.188643652                     |
| ETV084     | DIAGNOSIS   | SNV           | KRT7 E263Q     | 0                  | 25              | 10                | 22             | 0.454545 | 0.93                     | 0.488758553                     |
| ETV084     | DIAGNOSIS   | SNV           | LZTS2 S451Y    | 0                  | 36              | 11                | 20             | 0.55     | 0.93                     | 0.591397849                     |
| ETV084     | DIAGNOSIS   | SNV           | MORC4 R317K    | 0                  | 32              | 24                | 59             | 0.40678  | 0.93                     | 0.437397485                     |
| ETV084     | DIAGNOSIS   | SNV           | NNMT L45V      | 0                  | 18              | 25                | 26             | 0.961538 | 0.93                     | 1.033912324                     |
| ETV084     | DIAGNOSIS   | SNV           | OR5H15 L45M    | 0                  | 24              | 16                | 25             | 0.64     | 0.93                     | 0.688172043                     |
| ETV084     | DIAGNOSIS   | SNV           | PRL E98Q       | 0                  | 27              | 4                 | 40             | 0.1      | 0.93                     | 0.107526882                     |
| ETV084     | DIAGNOSIS   | SNV           | SEPT14 S82P    | 0                  | 25              | 31                | 65             | 0.476923 | 0.93                     | 0.512820513                     |
| ETV084     | DIAGNOSIS   | SNV           | SERPINA6 E138Q | 0                  | 30              | 11                | 33             | 0.333333 | 0.93                     | 0.358422939                     |
| ETV084     | DIAGNOSIS   | SNV           | SLC2A12 E21K   | 0                  | 16              | 8                 | 21             | 0.380952 | 0.93                     | 0.409626216                     |
| ETV084     | DIAGNOSIS   | SNV           | SLC6A7 R62C    | 0                  | 27              | 19                | 41             | 0.463415 | 0.93                     | 0.498295306                     |
| ETV084     | DIAGNOSIS   | SNV           | SULT4A1 T205M  | 0                  | 25              | 15                | 26             | 0.576923 | 0.93                     | 0.620347395                     |
| ETV084     | DIAGNOSIS   | SNV           | TMEM117 G377R  | 0                  | 26              | 26                | 48             | 0.541667 | 0.93                     | 0.582437276                     |
| ETV084     | DIAGNOSIS   | SNV           | UGT2B28 S19R   | 0                  | 11              | 26                | 26             | 1        | 0.93                     | 1.075268817                     |
| ETV084     | DIAGNOSIS   | SNV           | USH2A S1007L   | 0                  | 24              | 31                | 53             | 0.584906 | 0.93                     | 0.628930818                     |
| ETV084     | DIAGNOSIS   | SNV           | RBCK1 L130V    | 0                  | 20              | 11                | 28             | 0.392857 | 0.93                     | 0.422427035                     |
| ETV084     | DIAGNOSIS   | Fusion        | ETV6-RUNX1     | NA                 | NA              | NA                | NA             | NA       | NA                       | NA                              |
| ETV085     | DIAGNOSIS   | SNV           | AZ1 M681I      | 0                  | 33              | 24                | 42             | 0.571429 | 0.82                     | 0.696864111                     |
| ETV085     | DIAGNOSIS   | SNV           | CD101 S889F    | 0                  | 36              | 34                | 54             | 0.62963  | 0.82                     | 0.767841012                     |
| ETV085     | DIAGNOSIS   | SNV           | FAM157B L156F  | 0                  | 28              | 12                | 29             | 0.413793 | 0.82                     | 0.504625736                     |
| ETV085     | DIAGNOSIS   | SNV           | GRIN3A A401T   | 0                  | 24              | 35                | 59             | 0.59322  | 0.82                     | 0.723439438                     |
| ETV085     | DIAGNOSIS   | SNV           | IPO13 L267M    | 0                  | 30              | 24                | 60             | 0.4      | 0.82                     | 0.487804878                     |
| ETV085     | DIAGNOSIS   | SNV           | SPIRE1 R332W   | 0                  | 43              | 28                | 56             | 0.5      | 0.82                     | 0.609756098                     |
| ETV085     | DIAGNOSIS   | SNV           | DCAF8L2 N405S  | 0                  | 34              | 29                | 50             | 0.58     | 0.82                     | 0.707317073                     |
| ETV085     | DIAGNOSIS   | SNV           | FAM186A R2174Q | 0                  | 34              | 31                | 71             | 0.43662  | 0.82                     | 0.532463071                     |
| ETV085     | DIAGNOSIS   | SNV           | KLIF4 D462H    | 0                  | 23              | 17                | 43             | 0.395349 | 0.82                     | 0.482132728                     |
| ETV085     | DIAGNOSIS   | SNV           | NEIL3 D413N    | 0                  | 23              | 14                | 38             | 0.368421 | 0.82                     | 0.449293967                     |
| ETV085     | DIAGNOSIS   | SNV           | PDE3A P472T    | 0                  | 34              | 12                | 52             | 0.230769 | 0.82                     | 0.281425891                     |
| ETV085     | DIAGNOSIS   | SNV           | POLB E203K     | 0                  | 40              | 26                | 46             | 0.565217 | 0.82                     | 0.689289502                     |
| ETV085     | DIAGNOSIS   | SNV           | SHOX2 E3K      | 0                  | 28              | 10                | 40             | 0.25     | 0.82                     | 0.304878049                     |
| ETV085     | DIAGNOSIS   | SNV           | TRIM64B D246N  | 0                  | 66              | 22                | 81             | 0.271605 | 0.82                     | 0.331225534                     |
| ETV085     | DIAGNOSIS   | SNV           | ZNF687 K588R   | 0                  | 36              | 23                | 56             | 0.410714 | 0.82                     | 0.50087108                      |
| ETV085     | DIAGNOSIS   | SNV           | TMEM104 V281I  | 0                  | 33              | 22                | 44             | 0.5      | 0.82                     | 0.609756098                     |
| ETV085     | DIAGNOSIS   | Fusion        | ETV6-RUNX1     | NA                 | NA              | NA                | NA             | NA       | NA                       | NA                              |

**Table S8. Single-cell indexed FACS median fluorescence intensity (MFI)**

**(Table too large to embed in this Word document, so provided as a separate file)**
